# Supplementary material for: Thiacalixarene “knot” effect on protein binding by oligolactic acid particles
Source: Royal Society of Chemistry journal article supplement (doi:10.1039/c8qm00435h), 2018-12-11
Supplement: c8qm00435h1.pdf [file c8qm00435h1.pdf]

## Thiacalixarene “knot” effect on protein binding by oligolactic acid particles

Olga A Mostovaya<sup>a</sup>, Vladimir V. Gorbachuk<sup>a</sup>, Olga B. Bazanova<sup>b</sup>, Alexander V. Gerasimov<sup>a</sup>, Vladimir G. Evtugyn<sup>c</sup>, Yury N. Osin<sup>c</sup>, Viktor D. Myakushev<sup>d</sup>, Ildar Kh. Rizvanov<sup>b</sup>, Ivan I. Stoikov<sup>a</sup>

---

<sup>a.</sup> *Kazan Federal University, A.M. Butlerov Chemistry Institute, 420008, Kremlevskaya Street, 18, Kazan, Russian Federation. E-mail: Ivan.Stoikov@mail.ru; Fax: +7-8432-752253; Tel: +7-8432-337463*

<sup>b.</sup> *Arbuzov Institute of Organic and Physical Chemistry, FRC Kazan Scientific Center of RAS*

<sup>c.</sup> *Interdisciplinary Center for Analytical Microscopy of Kazan Federal University, 420008 Kazan, Russian Federation*

<sup>d.</sup> *Enikolopov Institute of Synthetic Polymeric Materials, Russian Academy of Sciences, Moscow 117393, Russian Federation*

*Electronic Supplementary Information*

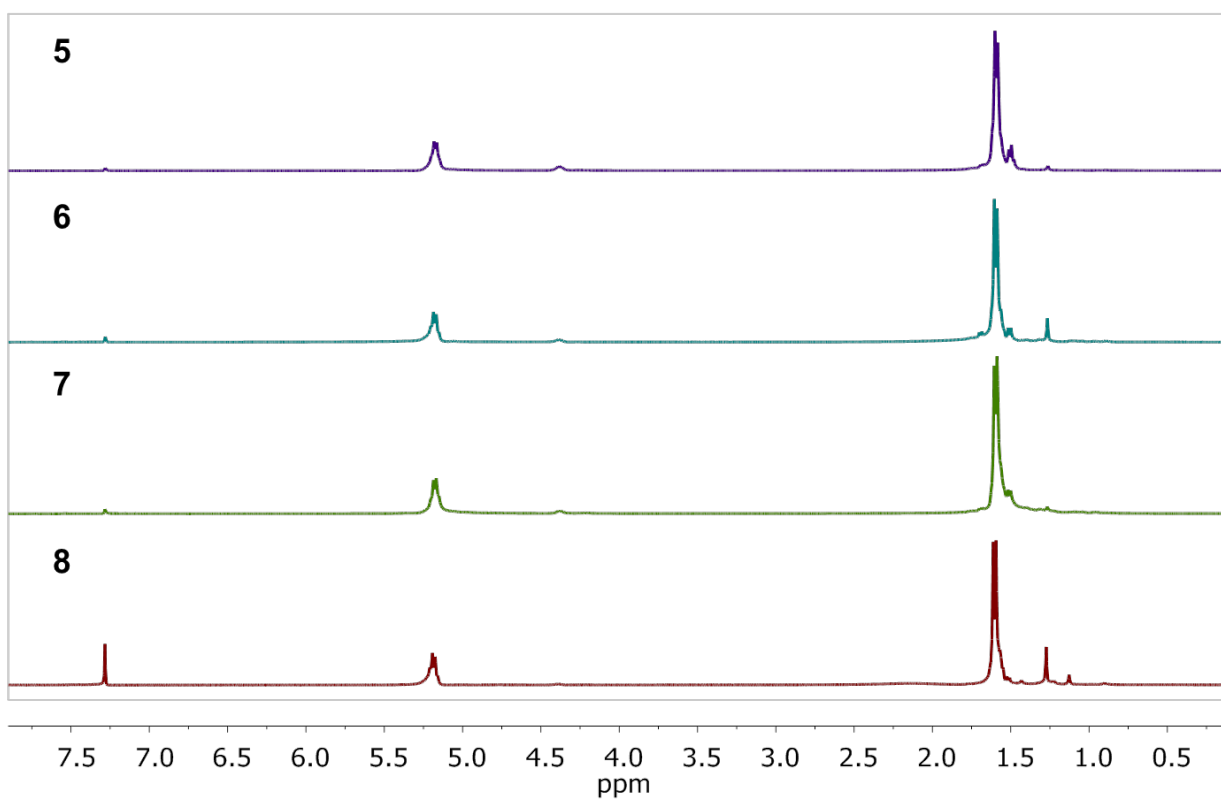

**Fig.S1.**  $^1\text{H}$  NMR ( $\text{CDCl}_3$ ) spectra of products **5-8**.

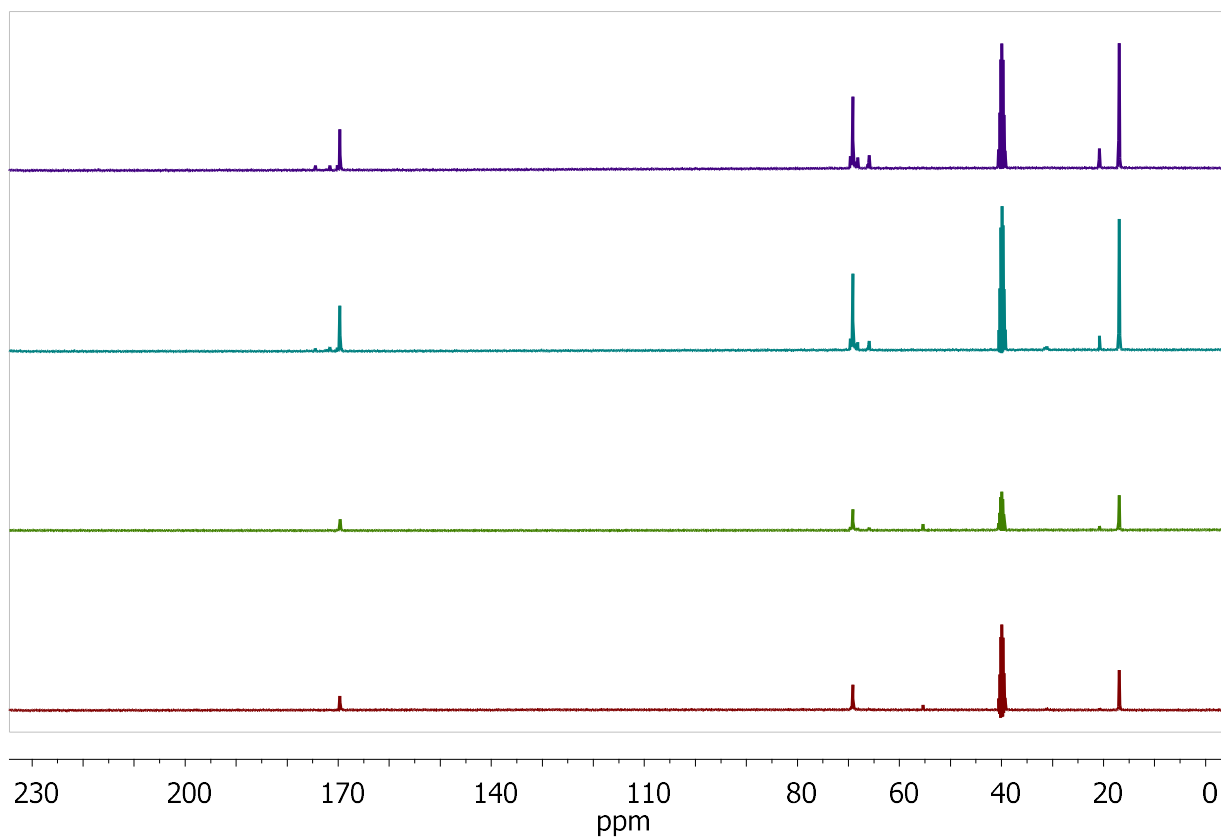

**Fig.S2.**  $^{13}\text{C}\{\text{H}\}$  NMR ( $\text{DMSO-}d_6$ ) spectra of products **5-8**.

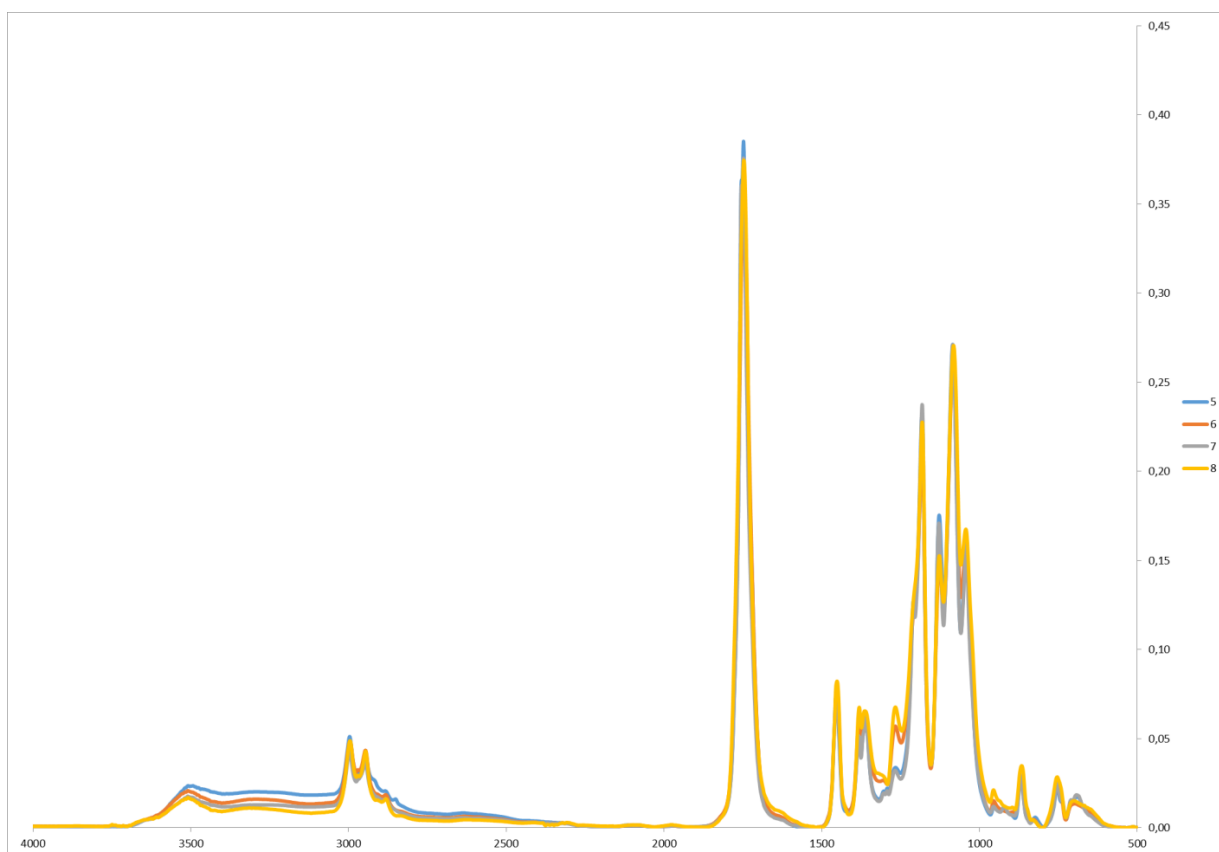

**Fig.S3.** FTIR-ATR spectra of products **5-8**.

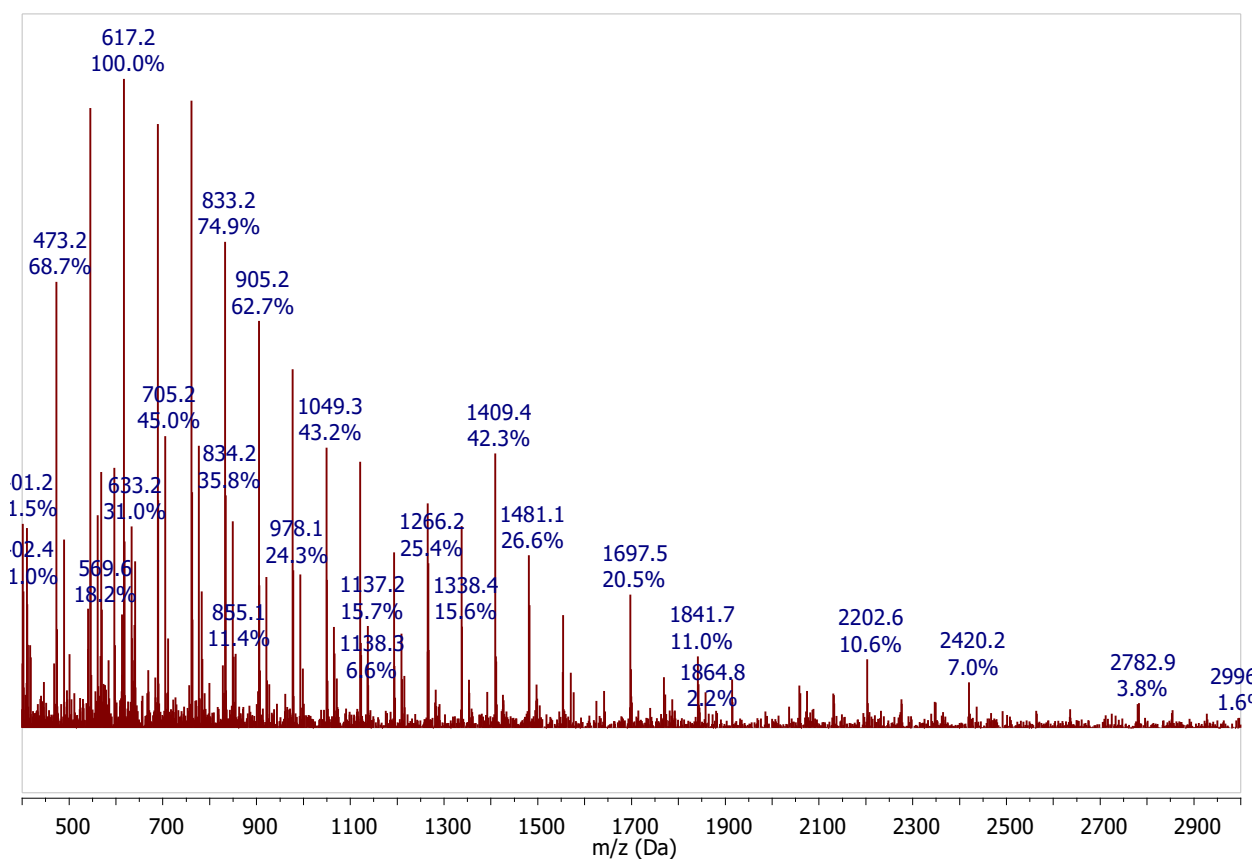

**Fig.S4.** MALDI mass-spectrum of product **5**, matrix - 2,5-dihydroxybenzoic acid

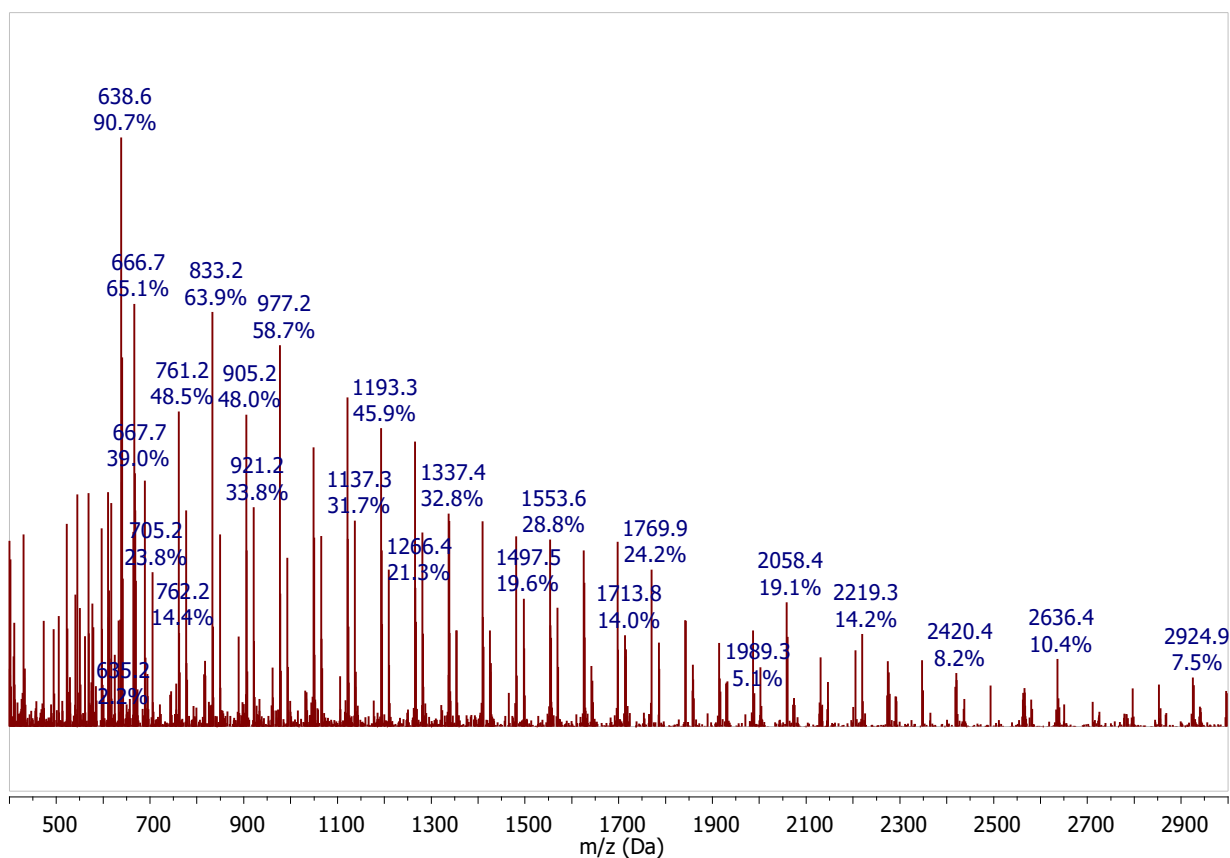

**Fig.S5.** MALDI mass-spectrum of product **6**, matrix - 2,5-dihydroxybenzoic acid

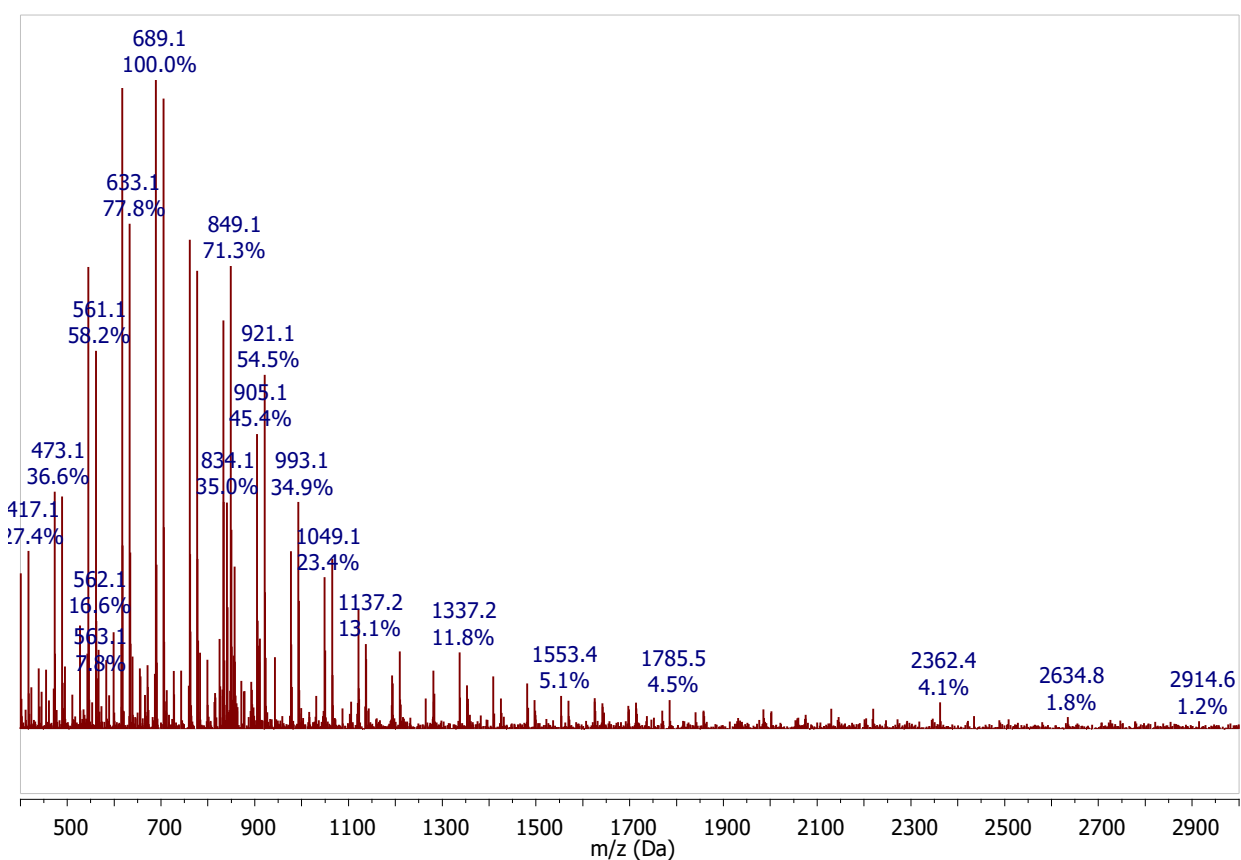

**Fig.S6.** MALDI mass-spectrum of product **7**, matrix - 2,5-dihydroxybenzoic acid

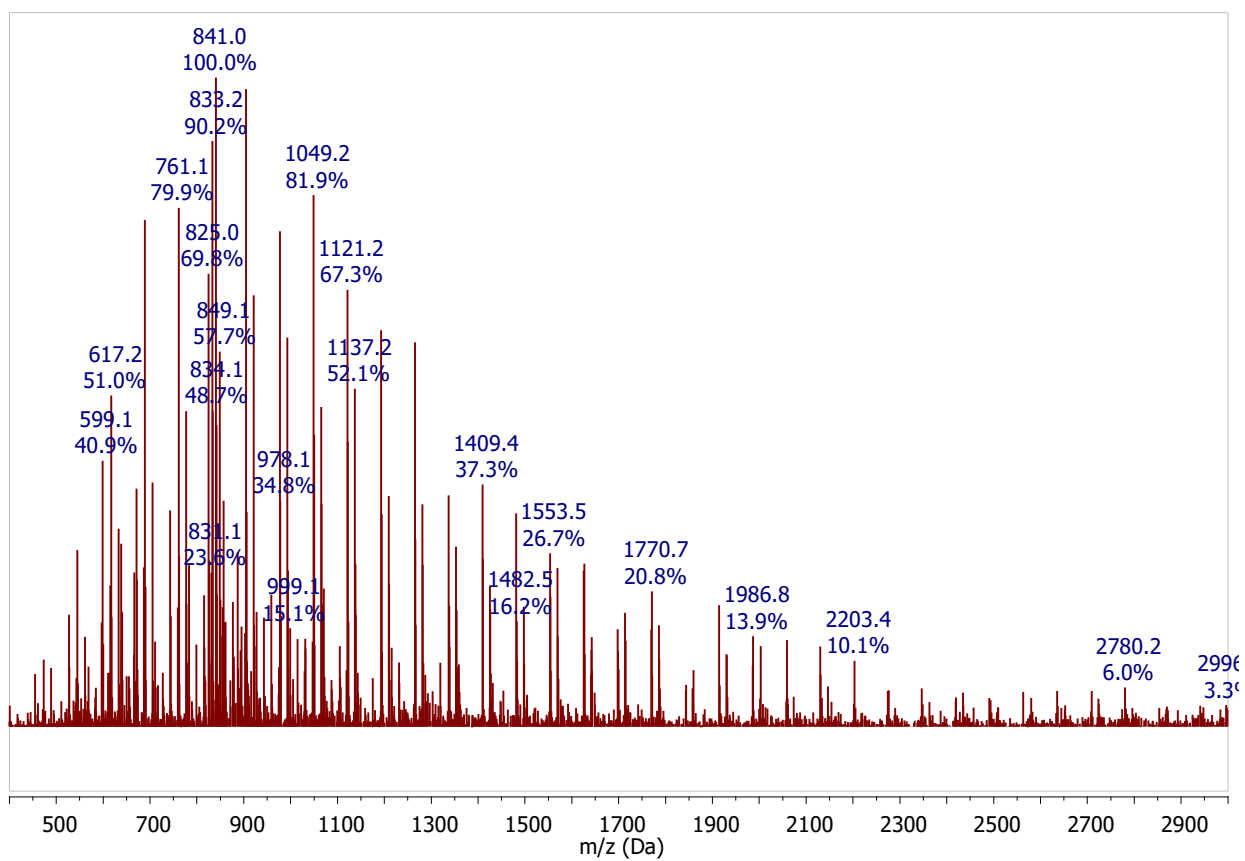

**Fig.S7.** MALDI mass-spectrum of product **8**, matrix - 2,5-dihydroxybenzoic acid

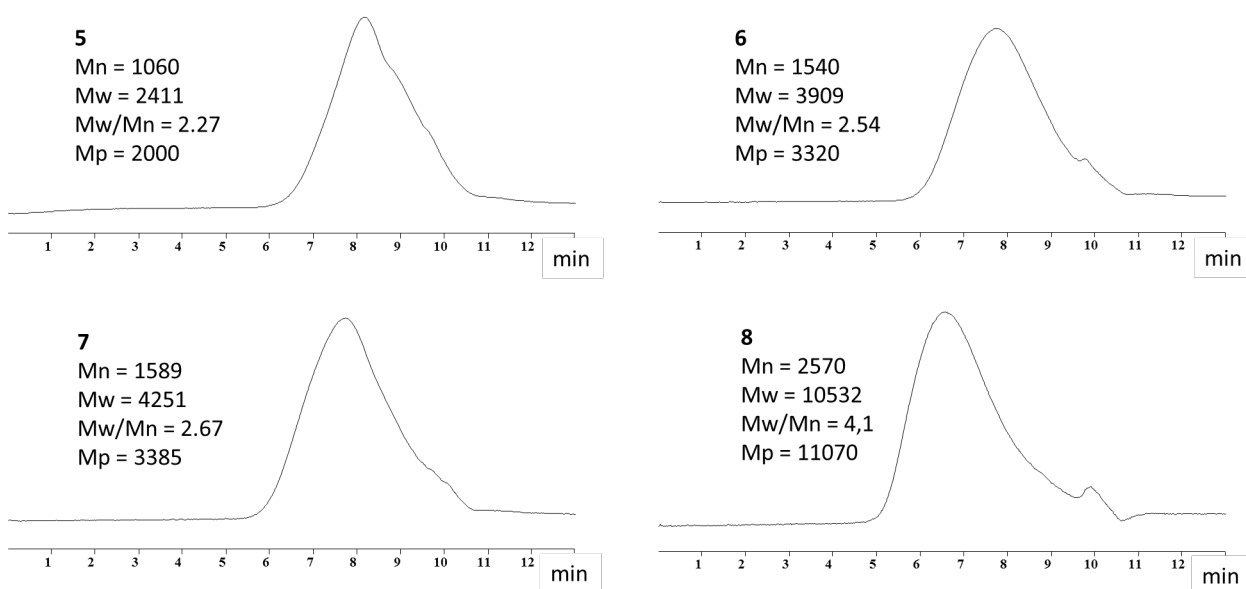

**Fig.S8.** GPC curves of products **5-8** (eluent-THF, calibrated by PS standards)

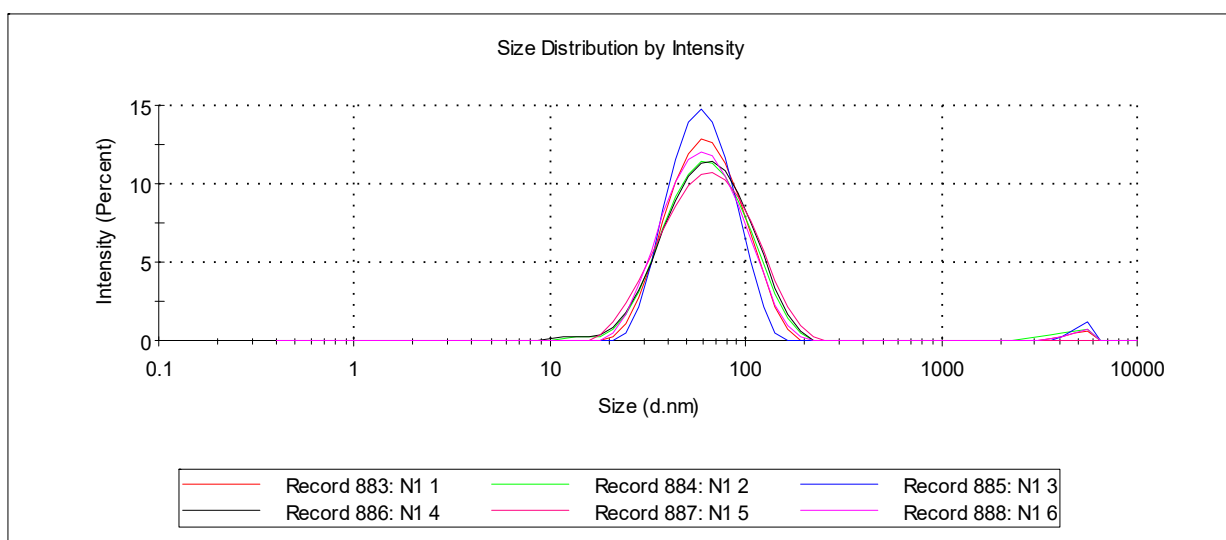

**Fig.S9.** Size distribution by intensity (DLS) of solution of the macrocycle **6**(*cone*, 0.19 mg/ml) in the 50 mM phosphate buffer at pH 7.4.

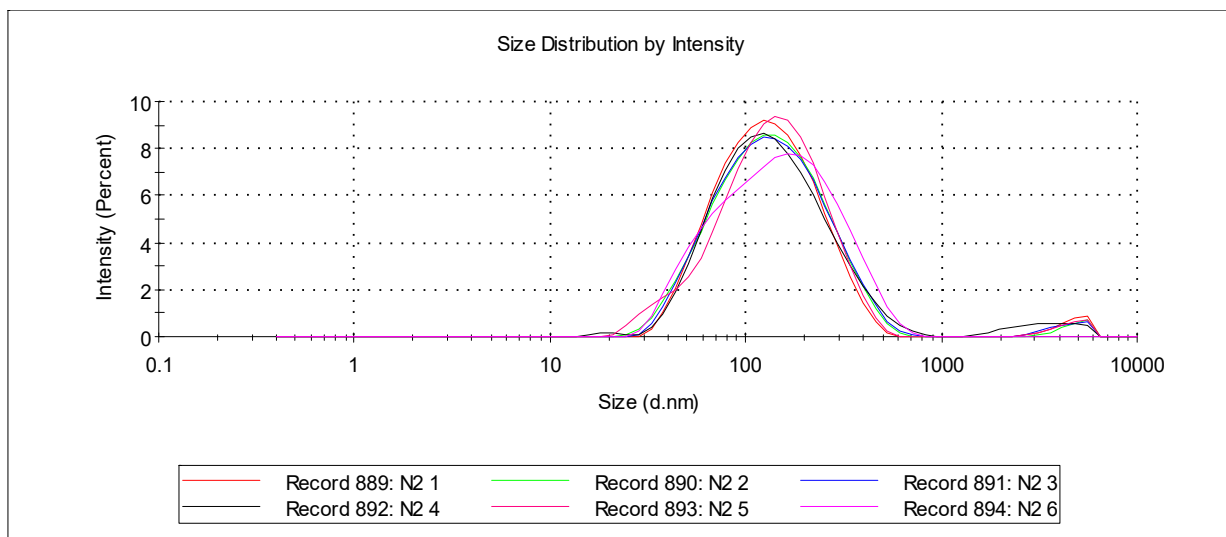

**Fig.S10.** Size distribution by intensity (DLS) of solution of the macrocycle **7** (*partial cone*, 0.19 mg/ml) in the 50 mM phosphate buffer at pH 7.4.

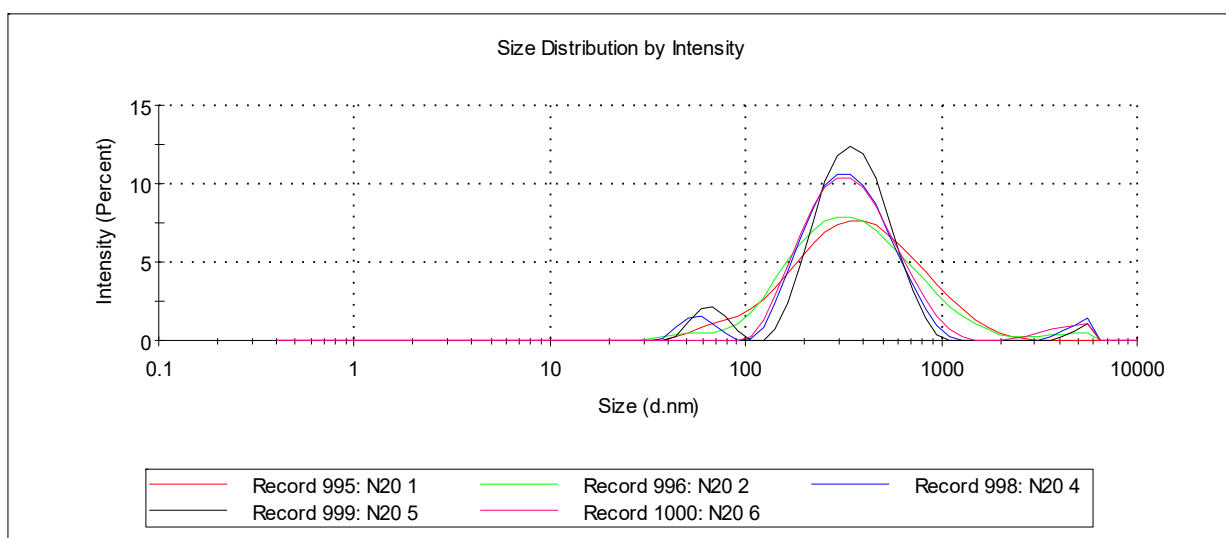

**Fig.S11.** Size distribution by intensity (DLS) of solution of the macrocycle **8** (*1,3-alternate*, 0.19 mg/ml) in the 50 mM phosphate buffer at pH 7.4.

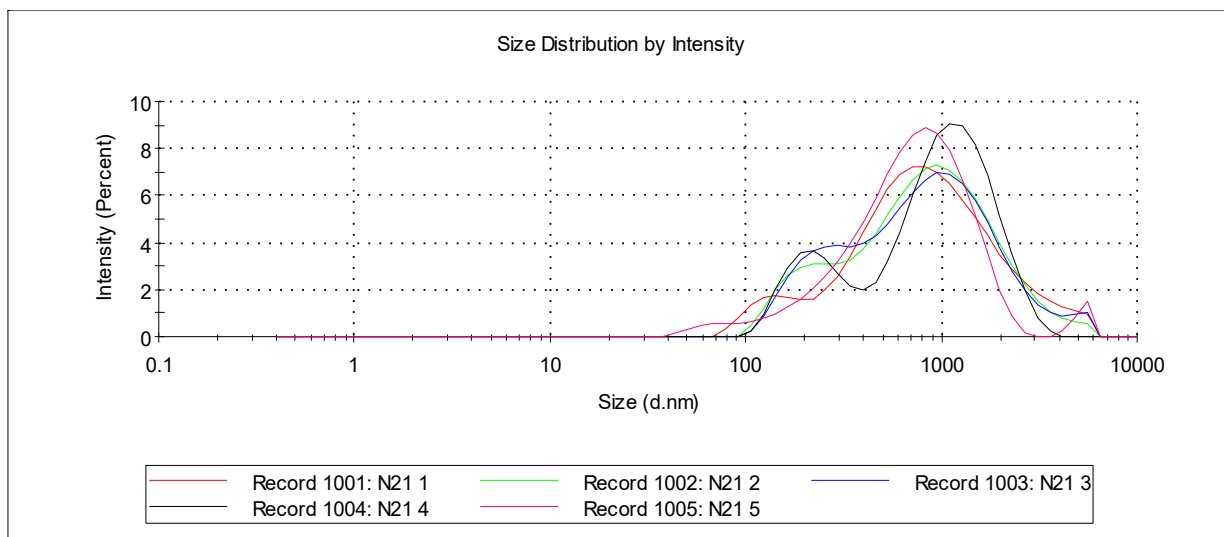

**Fig.S12.** Size distribution by intensity (DLS) of solution of the OLA-5 (0.19 mg/ml) in the 50 mM phosphate buffer at pH 7.4.

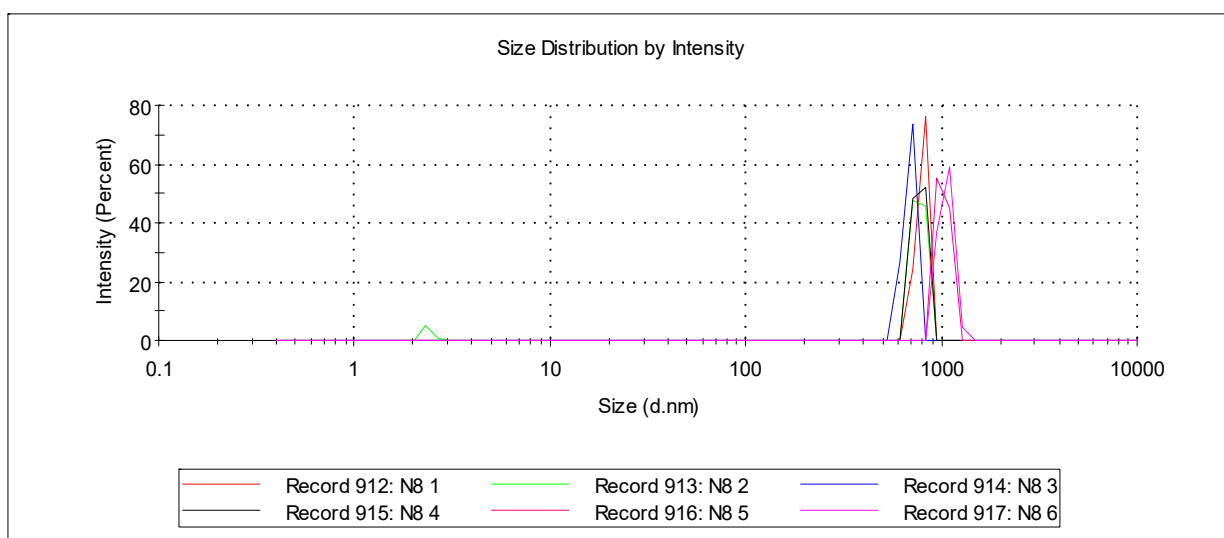

**Fig.S14.** Size distribution by intensity (DLS) of solution of the macrocycle **6**(*cone*, 0.19 mg/ml) and lysozyme (10  $\mu$ M) in the 50 mM phosphate buffer at pH 7.4.



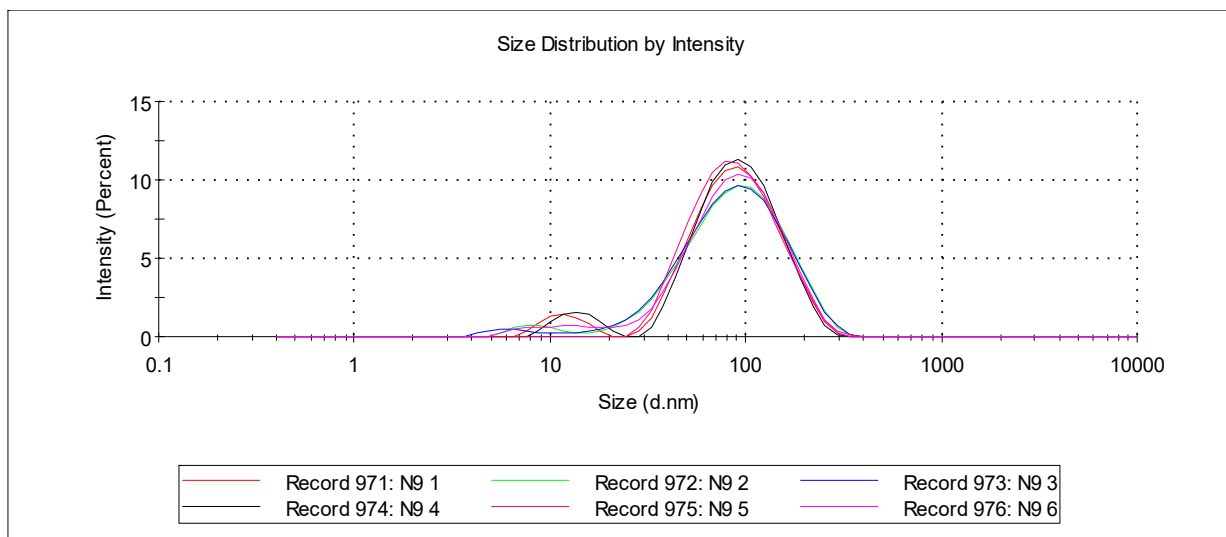

**Fig.S15.** Size distribution by intensity (DLS) of solution of the macrocycle **6** (*cone*, 0.19 mg/ml) and BSA (10  $\mu$ M) in the 50 mM phosphate buffer at pH 7.4.

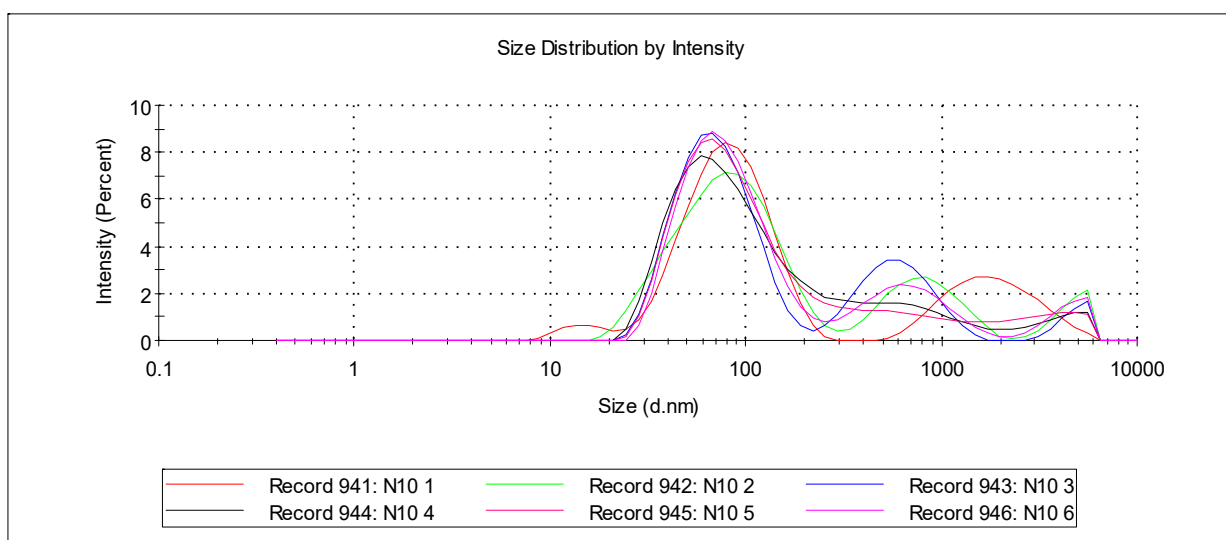

**Fig.S16.** Size distribution by intensity (DLS) of solution of the macrocycle **6** (*cone*, 0.19 mg/ml) and hemoglobin (10  $\mu$ M) in the 50 mM phosphate buffer at pH 7.4.

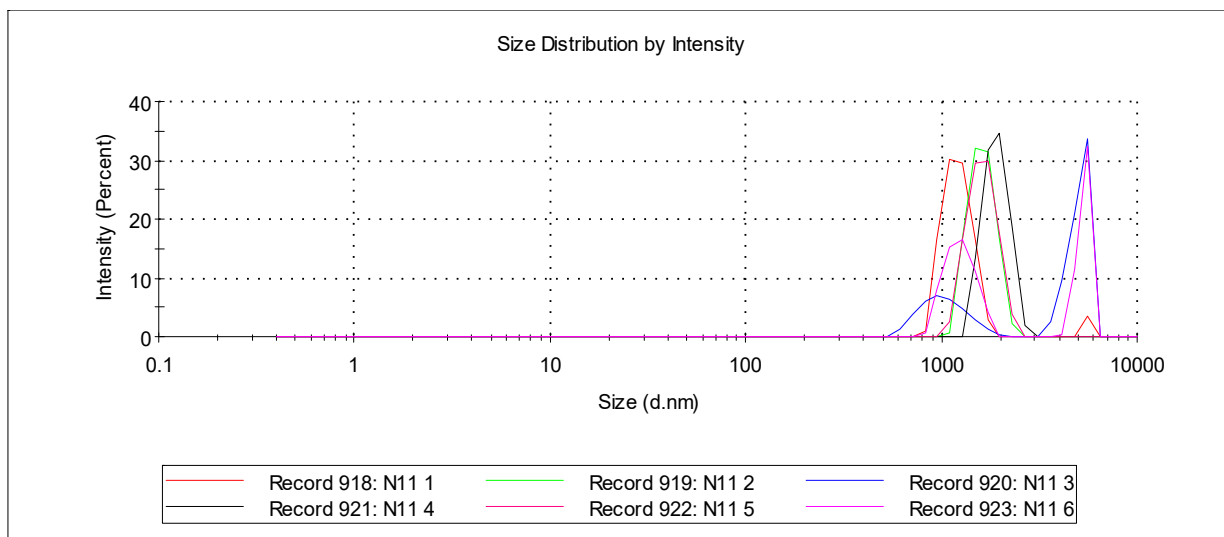

**Fig.S17.** Size distribution by intensity (DLS) of solution of the macrocycle **7** (*partial cone*, 0.19 mg/ml) and lysozyme (10  $\mu$ M) in the 50 mM phosphate buffer at pH 7.4.

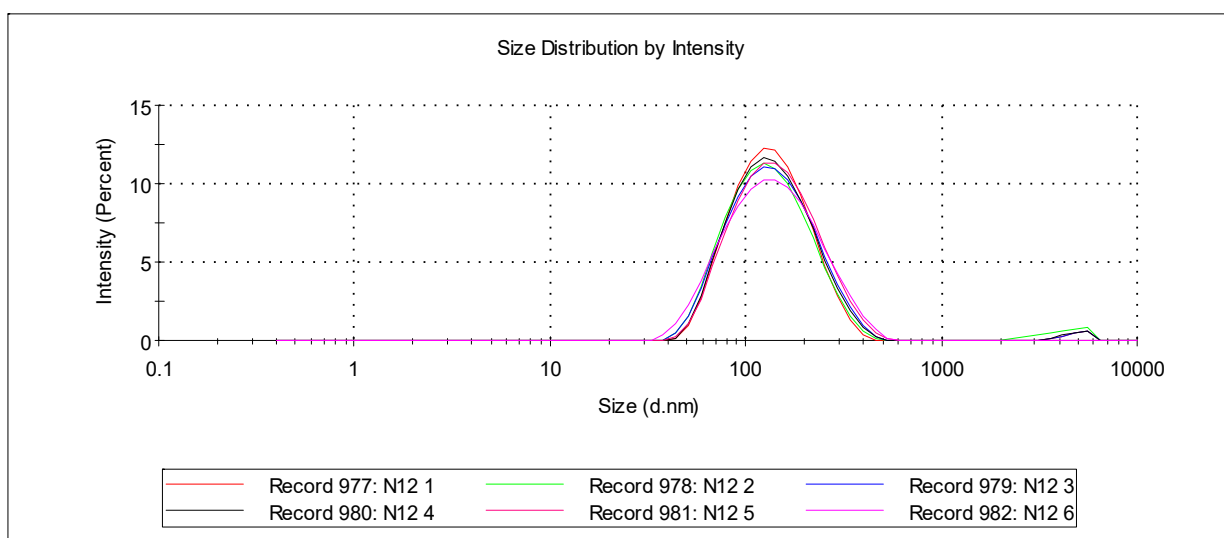

**Fig.S18.** Size distribution by intensity (DLS) of solution of the macrocycle **7** (*partial cone*, 0.19 mg/ml) and BSA (10  $\mu$ M) in the 50 mM phosphate buffer at pH 7.4.

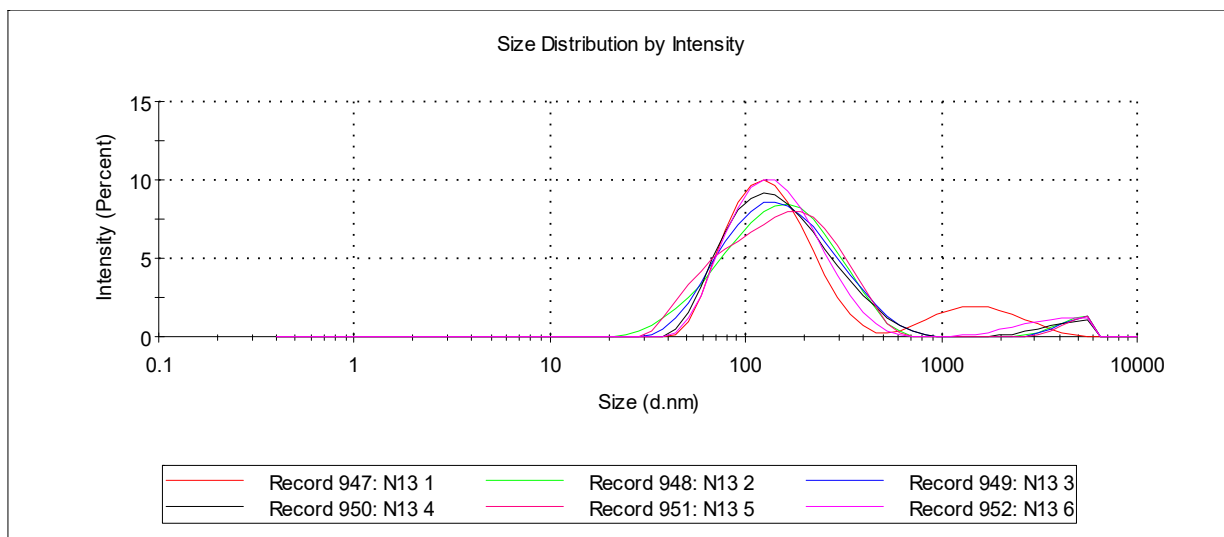

**Fig.S19.** Size distribution by intensity (DLS) of solution of the macrocycle **7** (*partial cone*, 0.19 mg/ml) and hemoglobin (10  $\mu$ M) in the 50 mM phosphate buffer at pH 7.4.

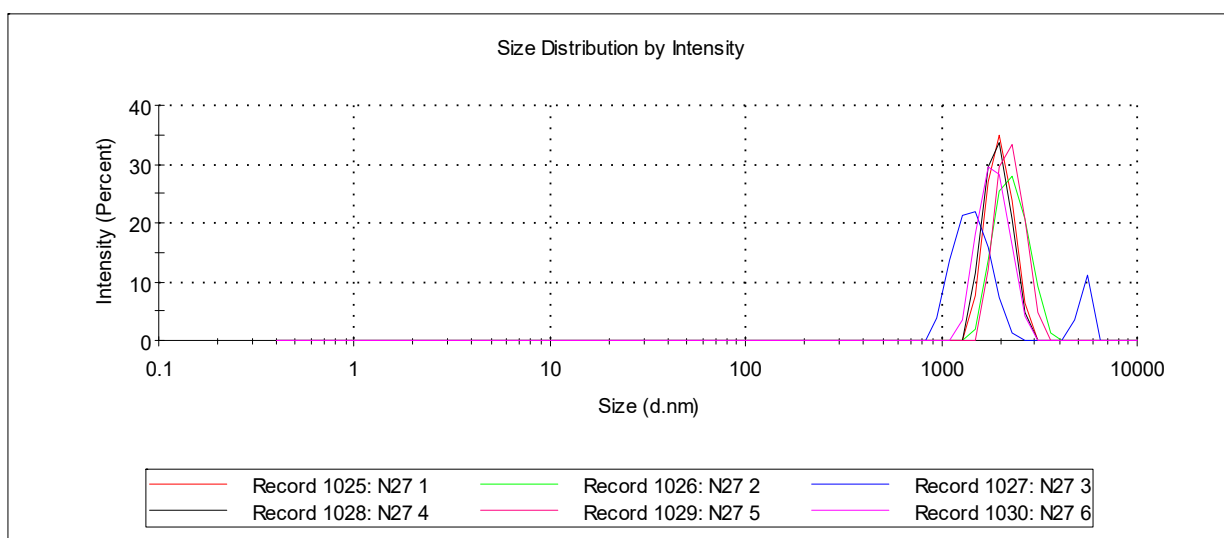

**Fig.S20.** Size distribution by intensity (DLS) of solution of the macrocycle **8** (*1,3-alternate*, 0.19 mg/ml) and lysozyme (10  $\mu$ M) in the 50 mM phosphate buffer at pH 7.4.

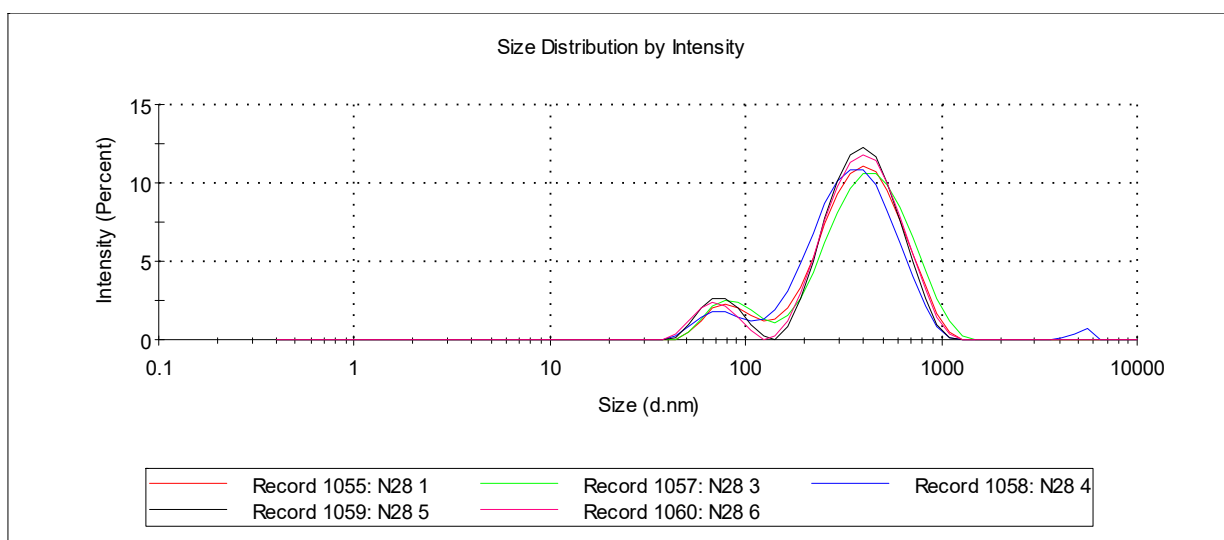

**Fig.S21.** Size distribution by intensity (DLS) of solution of the macrocycle **8** (*1,3-alternate*, 0.19 mg/ml) and BSA (10  $\mu$ M) in the 50 mM phosphate buffer at pH 7.4.

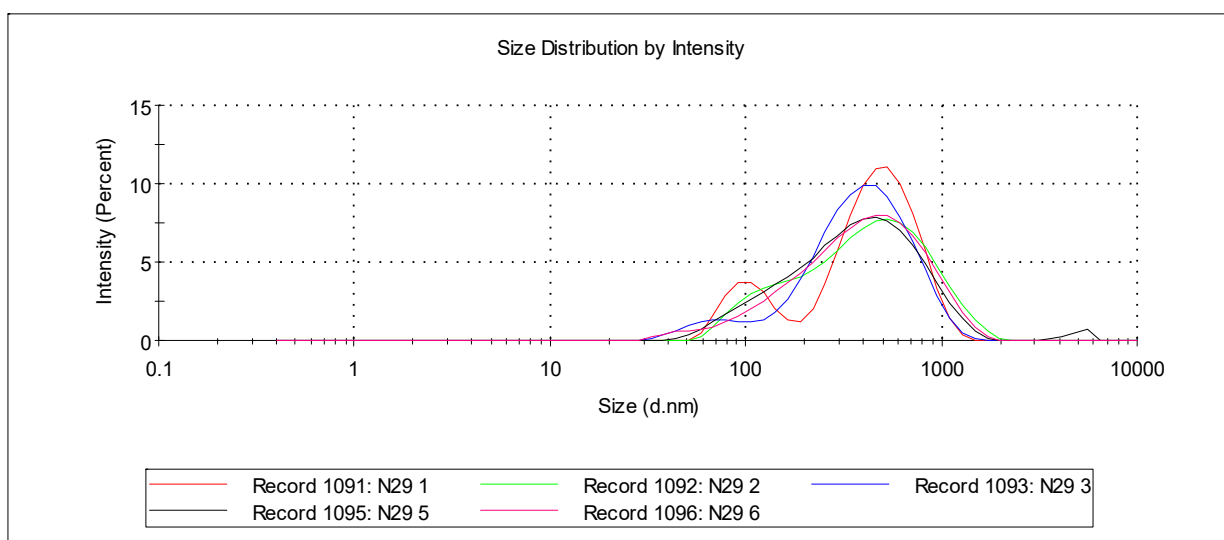

**Fig.S22.** Size distribution by intensity (DLS) of solution of the macrocycle **8** (*1,3-alternate*, 0.19 mg/ml) and hemoglobin (10  $\mu$ M) in the 50 mM phosphate buffer at pH 7.4.

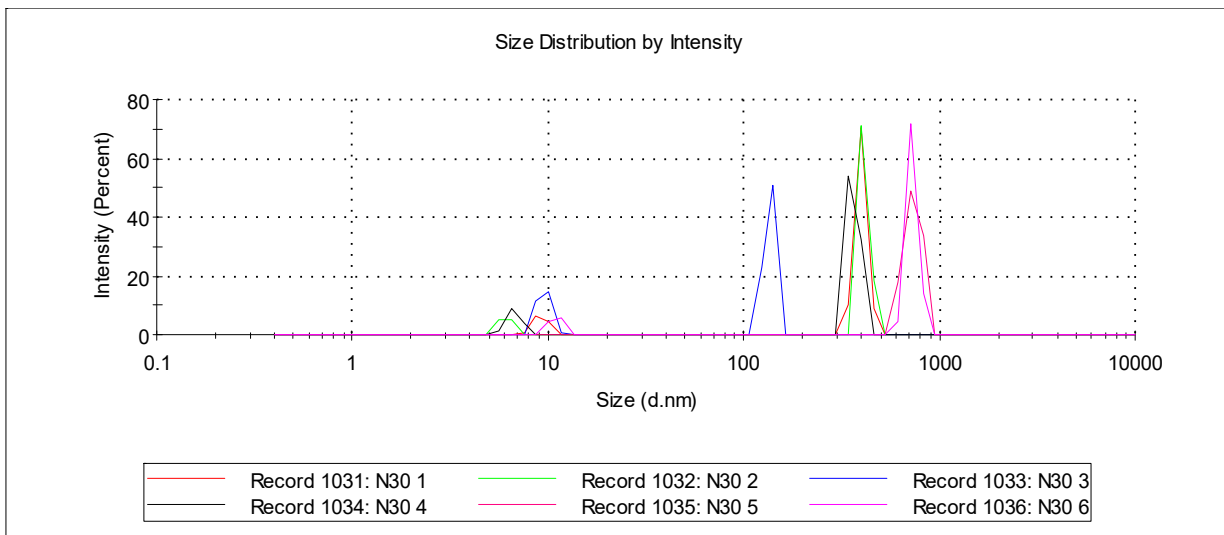

**Fig.S23.** Size distribution by intensity (DLS) of solution of the OLA-5 (0.19 mg/ml) and lysozyme (10  $\mu$ M) in the 50 mM phosphate buffer at pH 7.4.

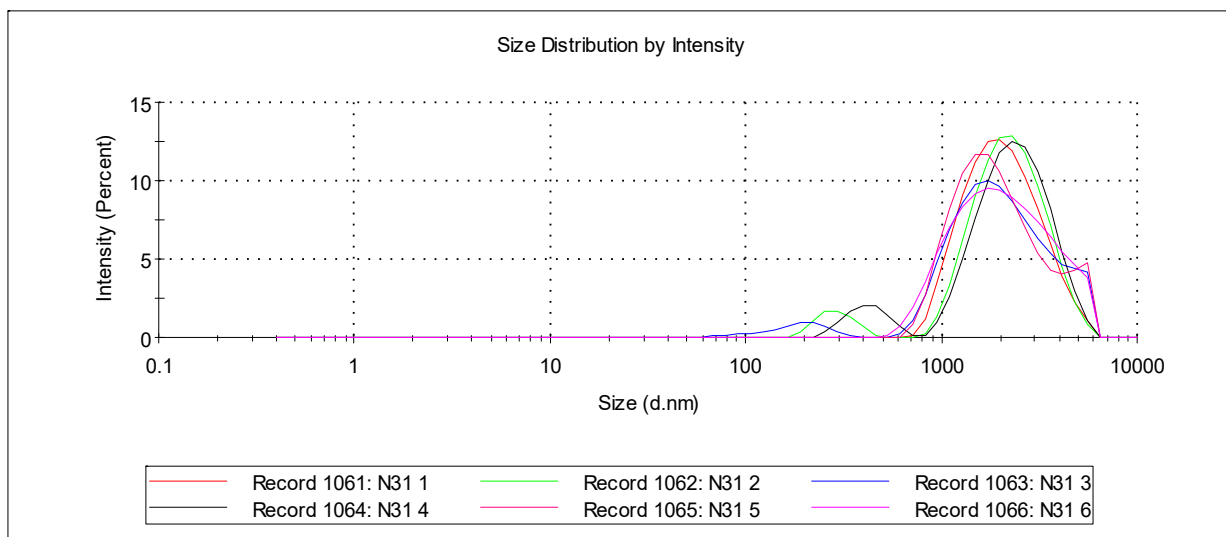

**Fig.S24.** Size distribution by intensity (DLS) of solution of the OLA-5 (0.19 mg/ml) and BSA (10  $\mu$ M) in the 50 mM phosphate buffer at pH 7.4.

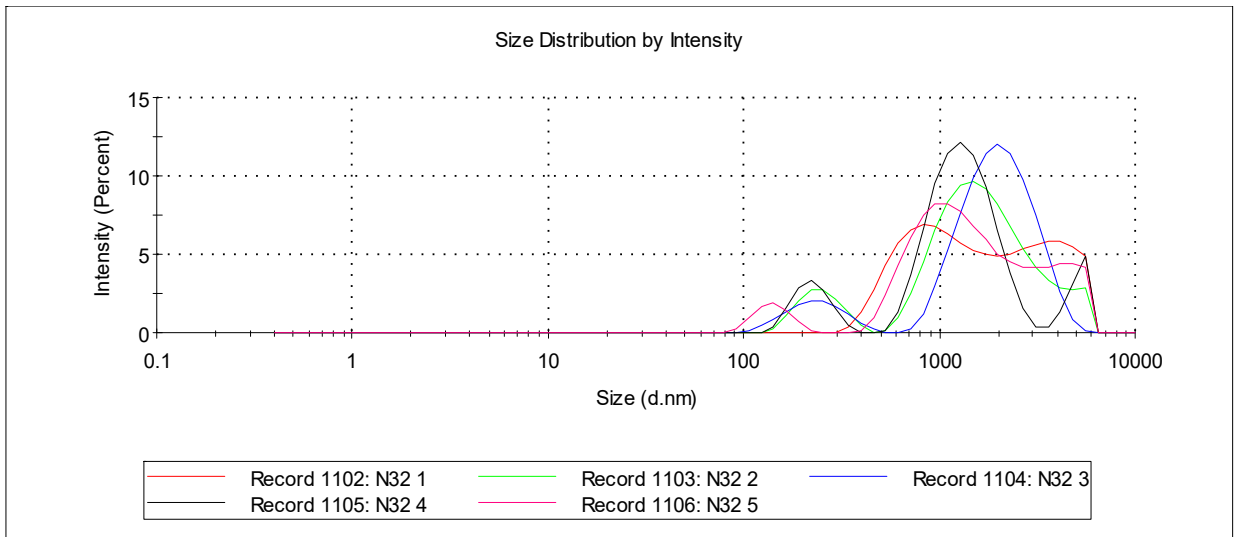

**Fig.S25.** Size distribution by intensity (DLS) of solution of the OLA-5 (0.19 mg/ml) and hemoglobin (10  $\mu$ M) in the 50 mM phosphate buffer at pH 7.4.

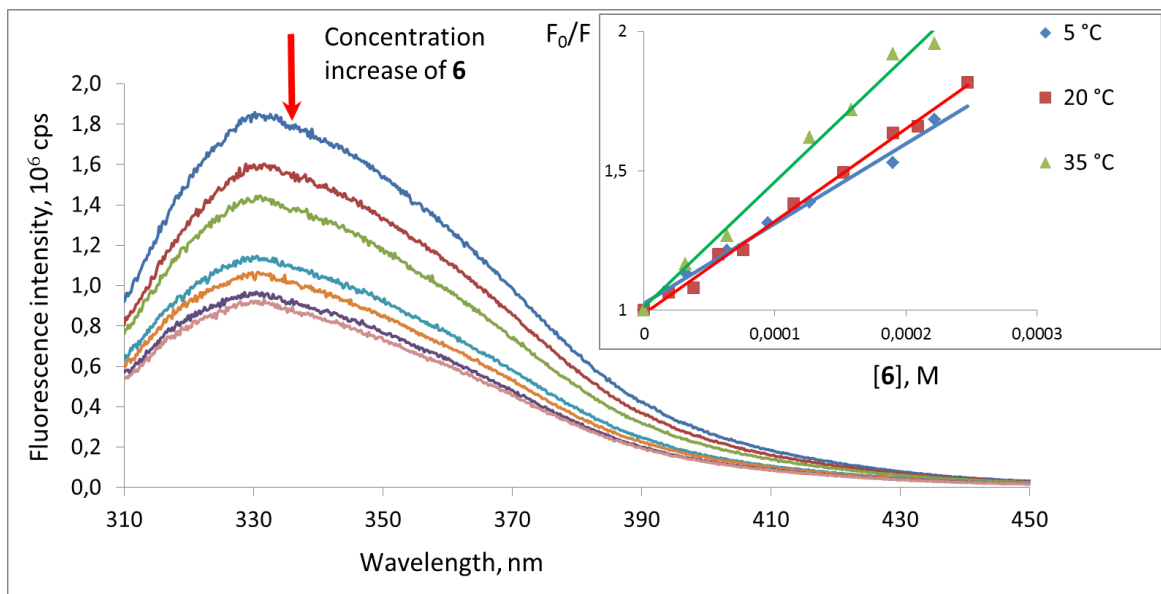

**Fig.S26.** Fluorescence spectra of BSA (5  $\mu$ M) at different concentrations of the compound **6** (0-0.5 mg/ml) in phosphate buffer at pH 7.4. The inset shows the plots of  $F_0/F$  vs. concentration of the compound **6** at different temperatures (5, 20 and 35  $^{\circ}$ C).  $\lambda_{ex}$ =285 nm;  $\lambda_{em}$ =330 nm.

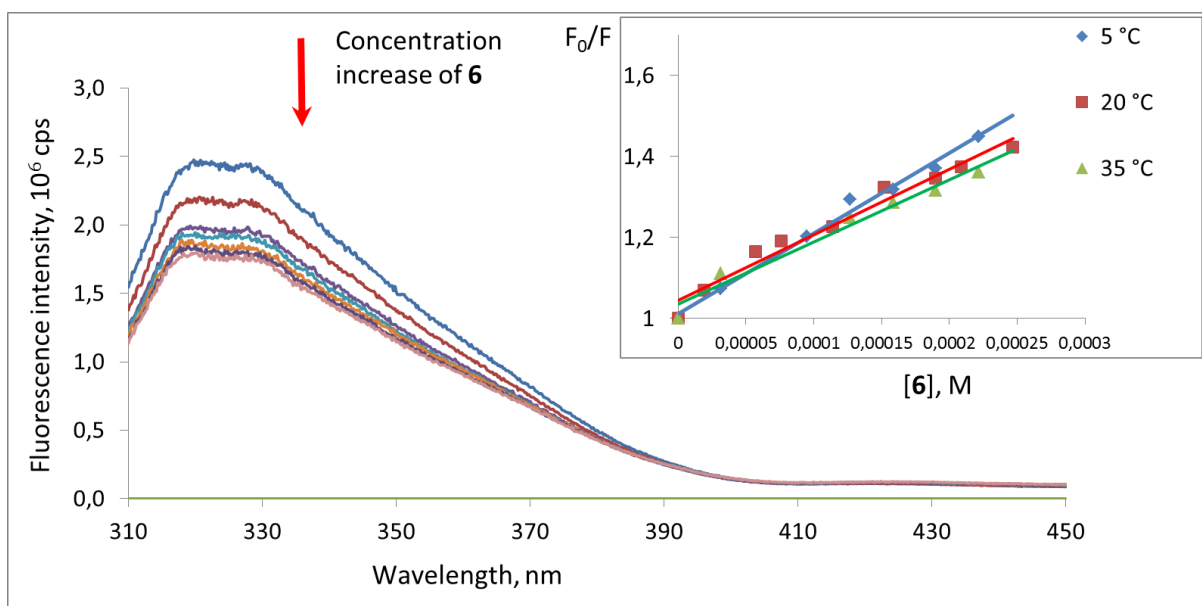

**Fig.S27.** Fluorescence spectra of Hb (5  $\mu$ M) at different concentrations of the compound **6** (0-0.5 mg/ml) in phosphate buffer at pH 7.4. The inset shows the plots of  $F_0/F$  vs. concentration of the compound **6** at different temperatures (5, 20 and 35  $^{\circ}$ C).  $\lambda_{ex}$ =285 nm;  $\lambda_{em}$ =330 nm.

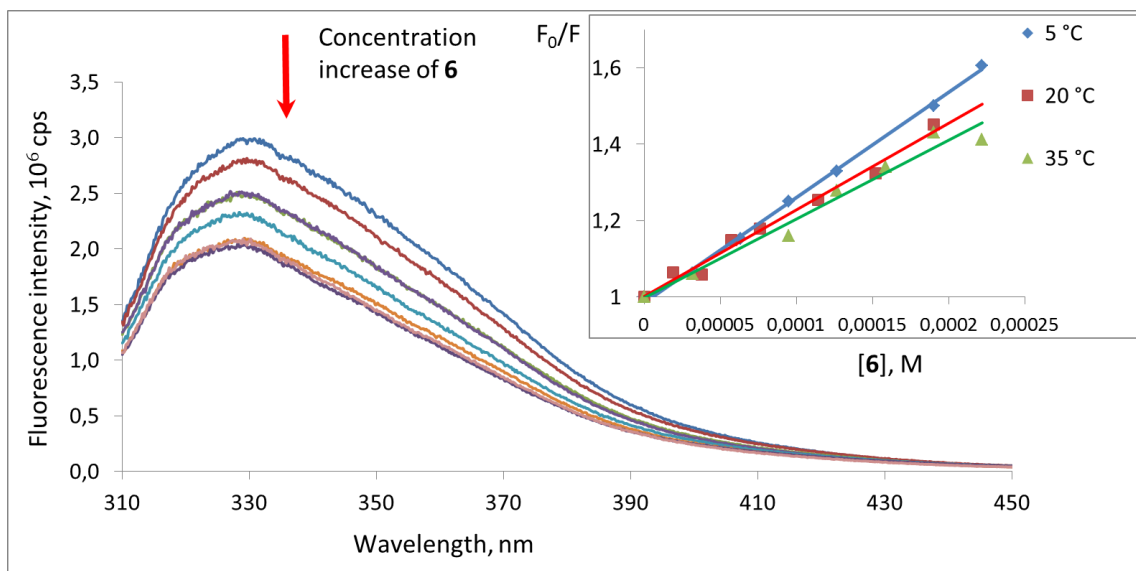

**Fig.S28.** Fluorescence spectra of Lys ( $5 \mu\text{M}$ ) at different concentrations of the compound **6** (0-0.5 mg/ml) in phosphate buffer at pH 7.4. The inset shows the plots of  $F_0/F$  vs. concentration of the compound **6** at different temperatures (5, 20 and 35 °C).  $\lambda_{\text{ex}}=285 \text{ nm}$ ;  $\lambda_{\text{em}}=330 \text{ nm}$ .

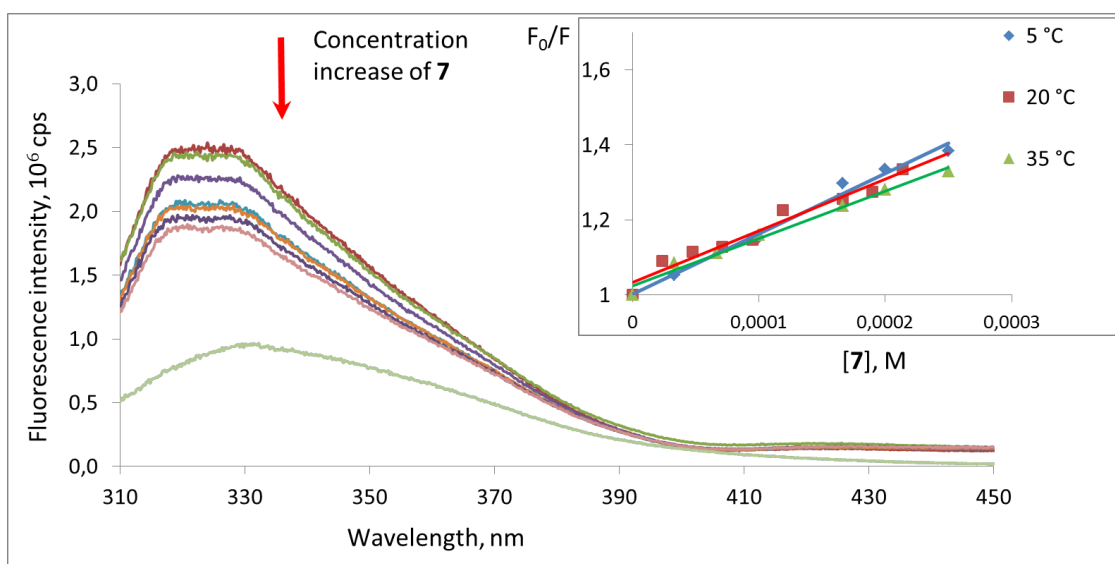

**Fig.S.29.** Fluorescence spectra of Hb ( $5 \mu\text{M}$ ) at different concentrations of the compound **7** (0-0.5 mg/ml) in phosphate buffer at pH 7.4. The inset shows the plots of  $F_0/F$  vs. concentration of the compound **7** at different temperatures (5, 20 and 35 °C).  $\lambda_{\text{ex}}=285 \text{ nm}$ ;  $\lambda_{\text{em}}=330 \text{ nm}$ .



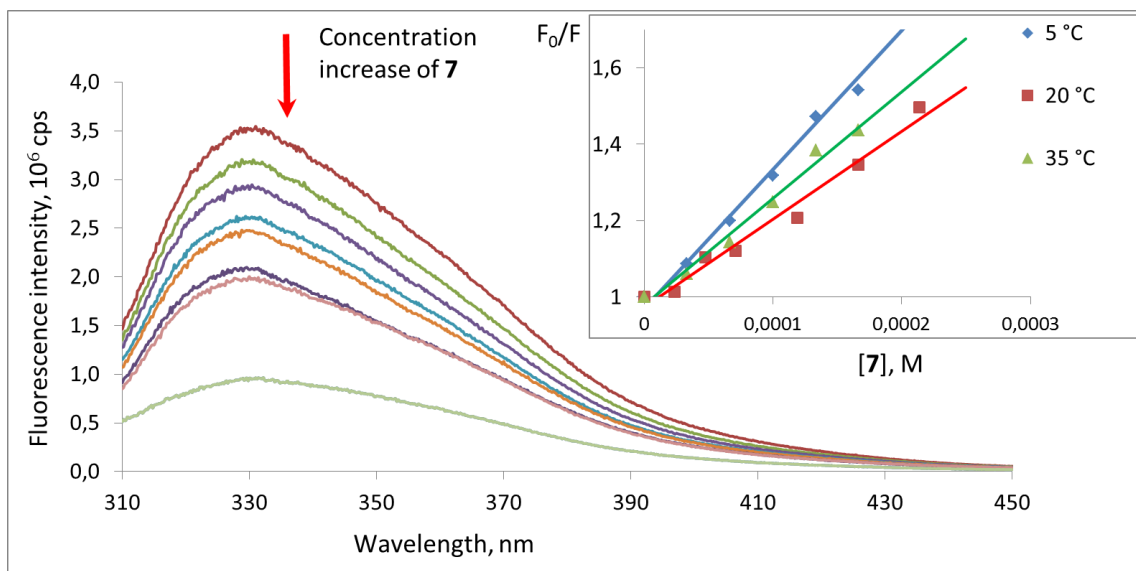

**Fig.S30.** Fluorescence spectra of Lys (5  $\mu\text{M}$ ) at different concentrations of the compound **7** (0-0.5 mg/ml) in phosphate buffer at pH 7.4. The inset shows the plots of  $F_0/F$  vs. concentration of the compound **7** at different temperatures (5, 20 and 35  $^{\circ}\text{C}$ ).  $\lambda_{\text{ex}}=285$  nm;  $\lambda_{\text{em}}=330$  nm.

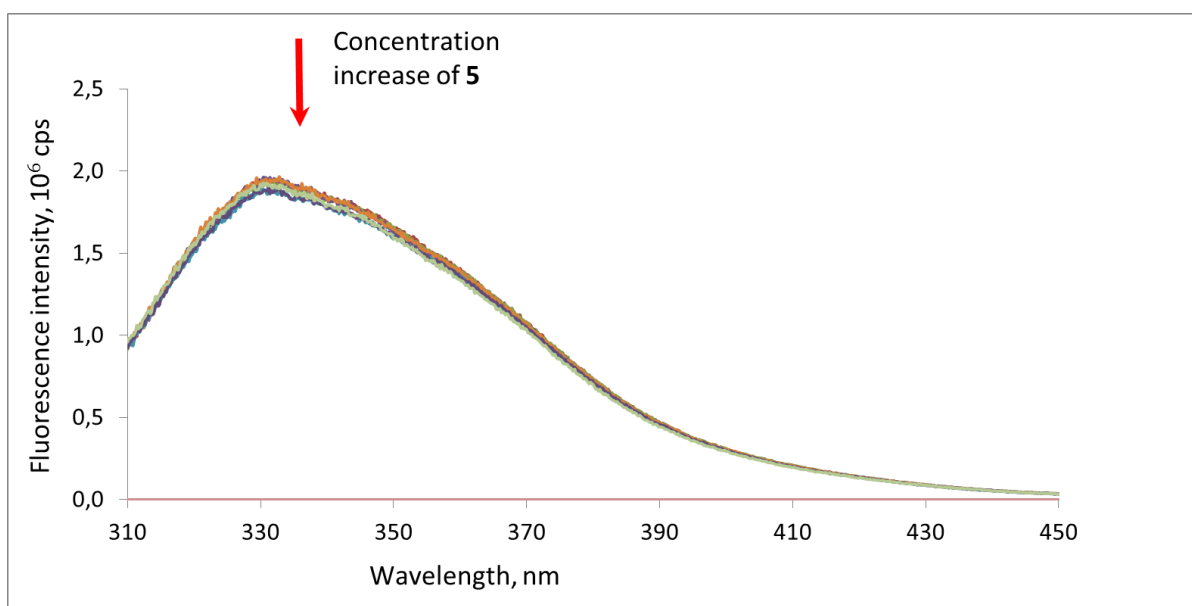

**Fig.S31.** Fluorescence spectra of BSA (5  $\mu\text{M}$ ) at different concentrations of the compound **5** (0-0.5 mg/ml) in phosphate buffer at pH 7.4.

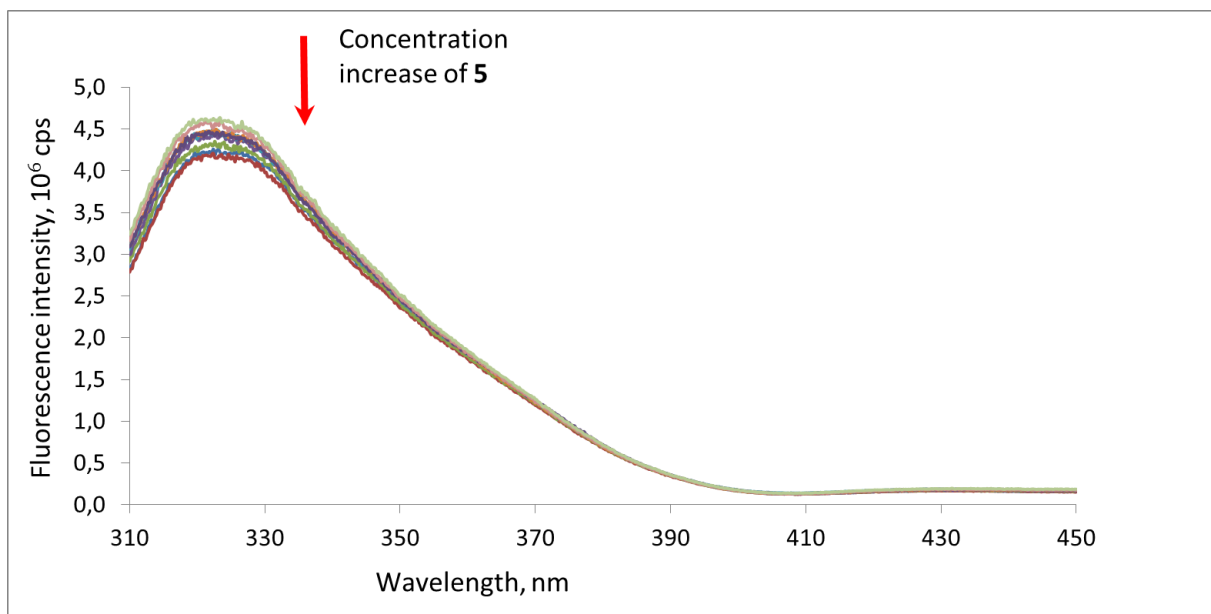

**Fig.S32.** Fluorescence spectra of Hb (5 μM) at different concentrations of the compound **5** (0-0.5 mg/ml) in phosphate buffer at pH 7.4.

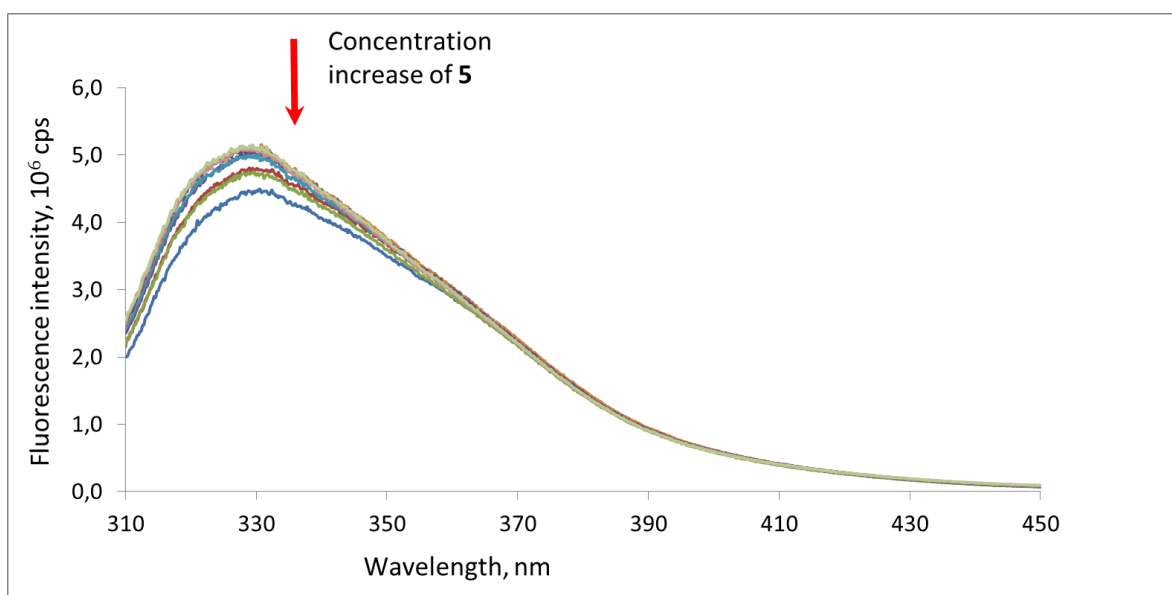

**Fig.S33.** Fluorescence spectra of Lys (5 μM) at different concentrations of the compound **5** (0-0.5 mg/ml) in phosphate buffer at pH 7.4.

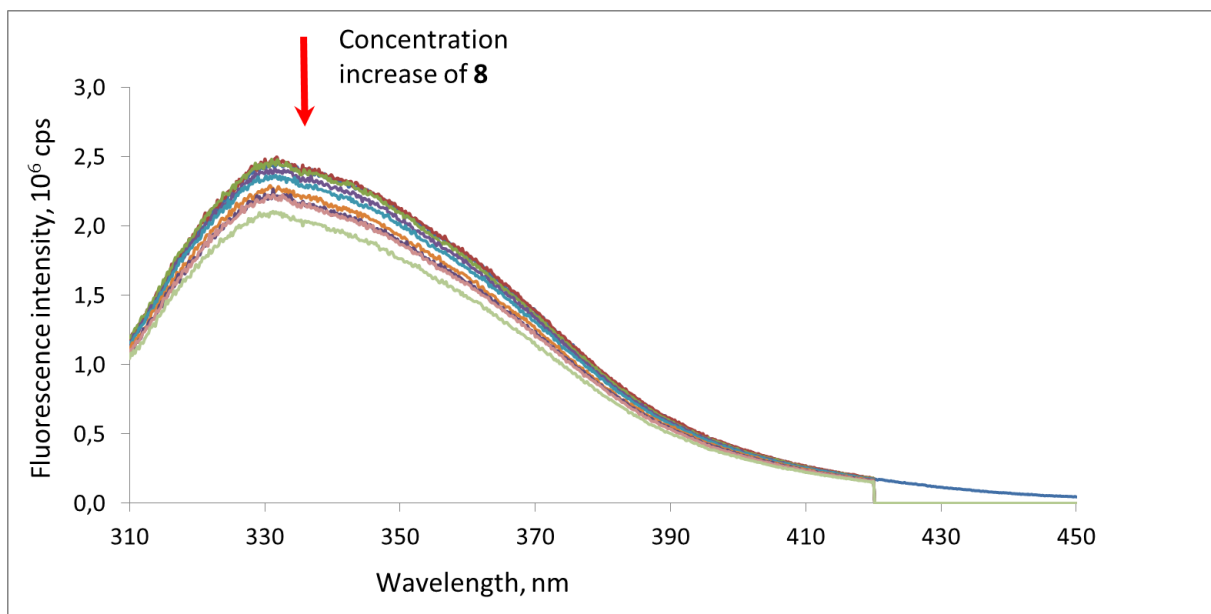

**Fig.S34.** Fluorescence spectra of BSA (5 μM) at different concentrations of the compound **8** (0-0.5 mg/ml) in phosphate buffer at pH 7.4.

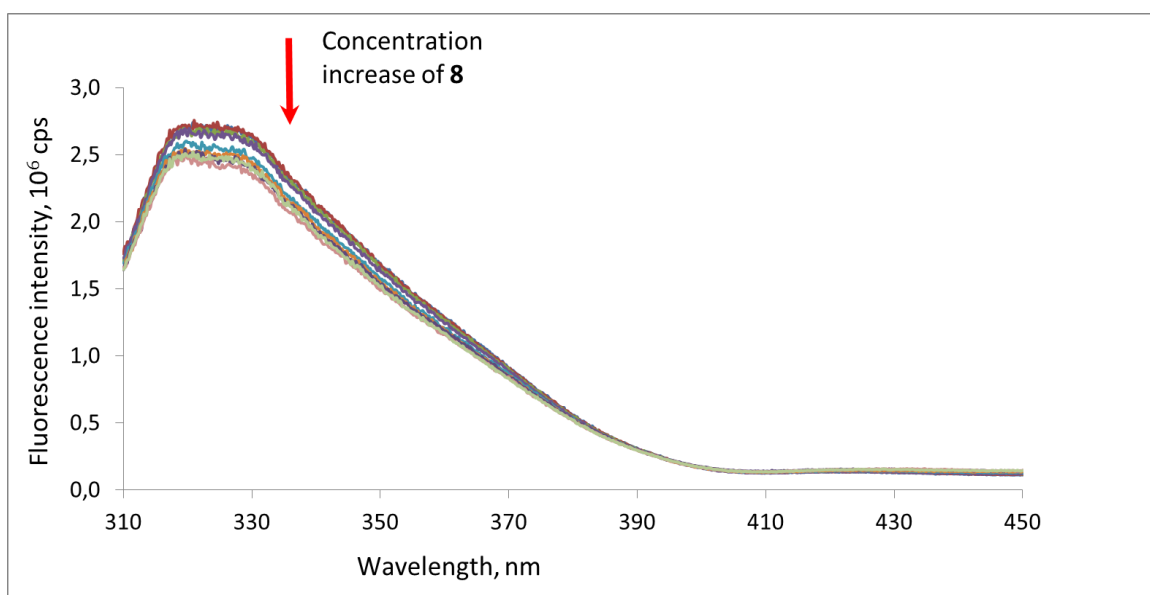

**Fig.S35.** Fluorescence spectra of Hb (5 μM) at different concentrations of the compound **8** (0-0.5 mg/ml) in phosphate buffer at pH 7.4.

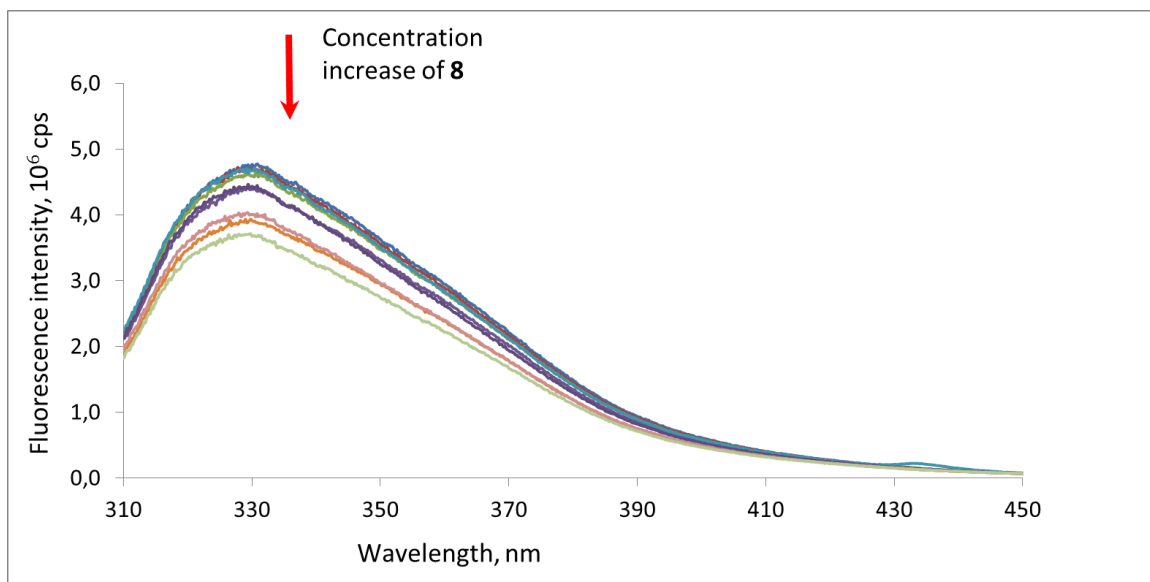

**Fig.S36.** Fluorescence spectra of Lys (5  $\mu$ M) at different concentrations of the compound **8** (0-0.5 mg/ml) in phosphate buffer at pH 7.4.

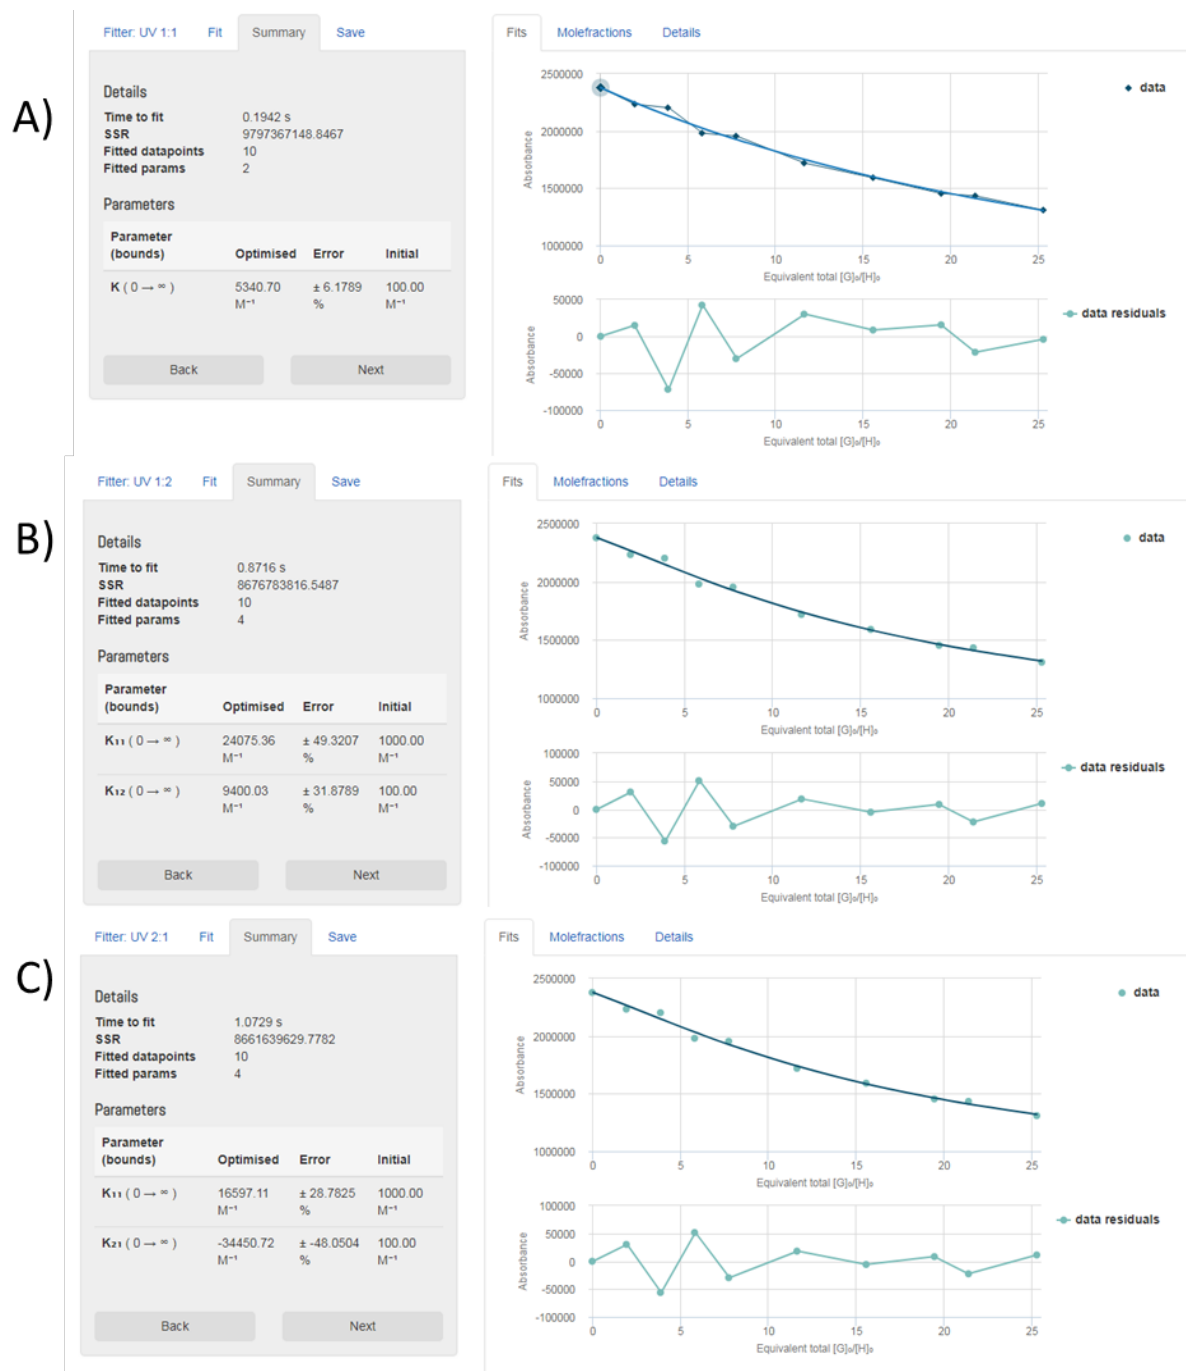

**Fig.S37.** Screenshots taken from the summary window of the website [supramolecular.org](http://supramolecular.org). These screenshots show the raw data for titration of **6** with BSA, the data fitted to 1:1 (A), 1:2 (B) and 2:1 (C) binding models.

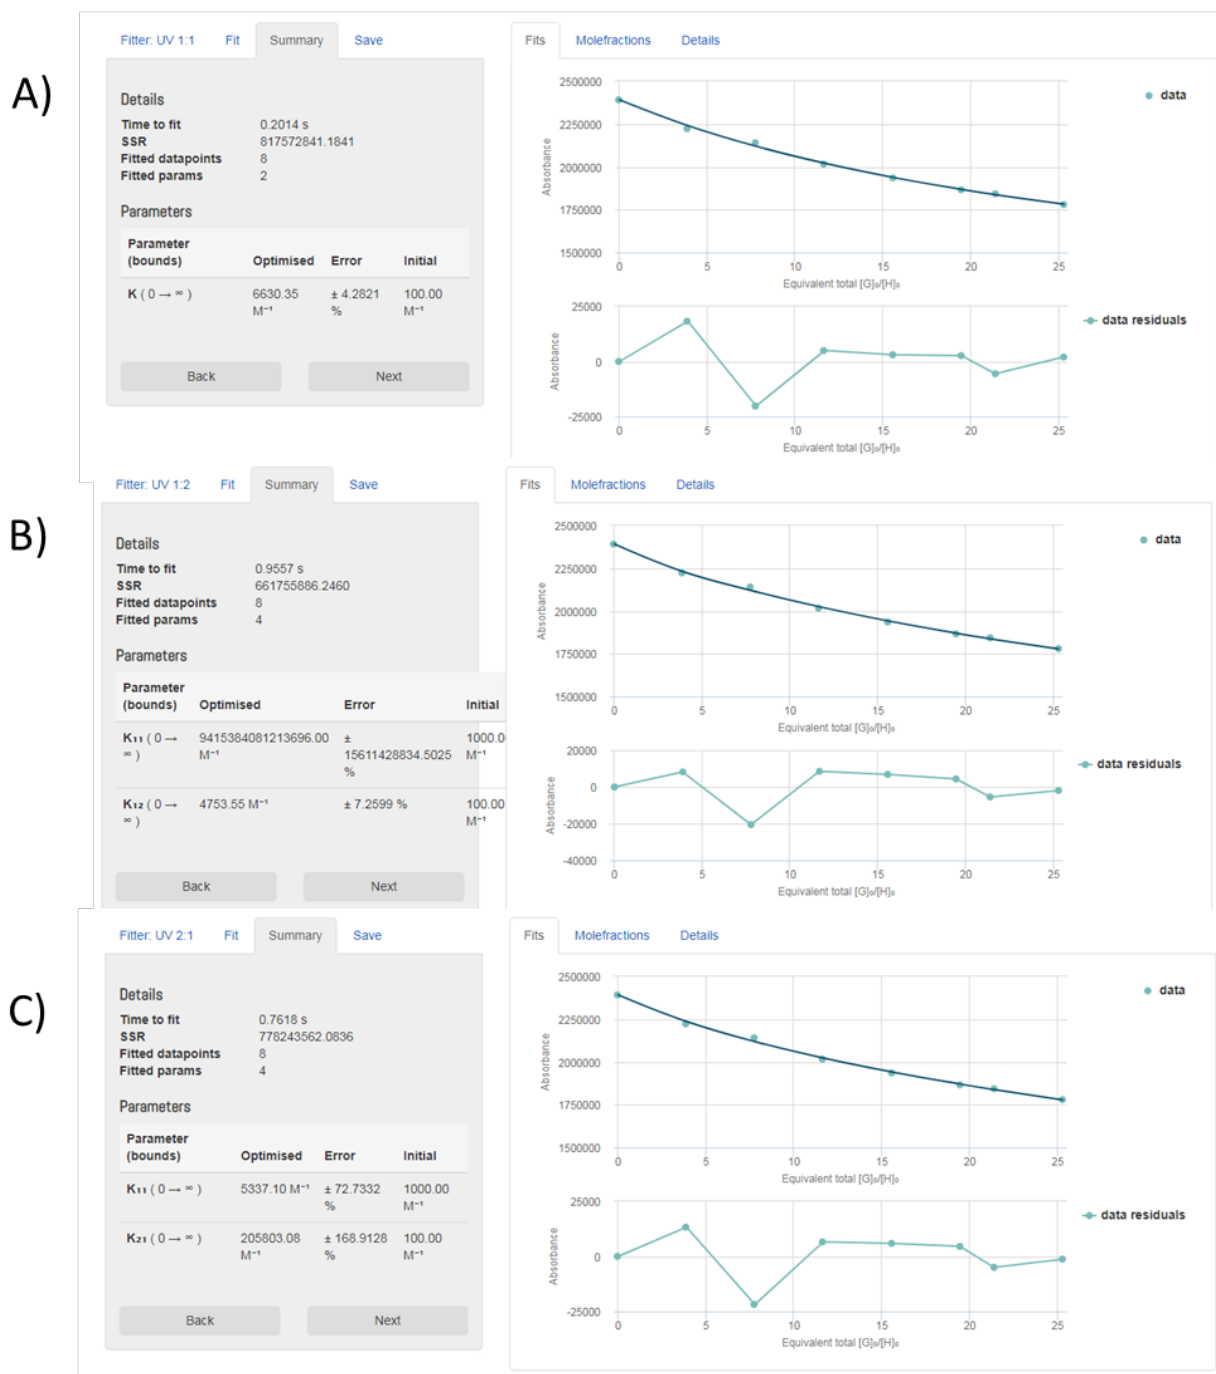

**Fig.S38.** Screenshots taken from the summary window of the website [supramolecular.org](http://supramolecular.org). These screenshots show the raw data for titration of **6** with Hb, the data fitted to 1:1 (A), 1:2 (B) and 2:1 (C) binding models..

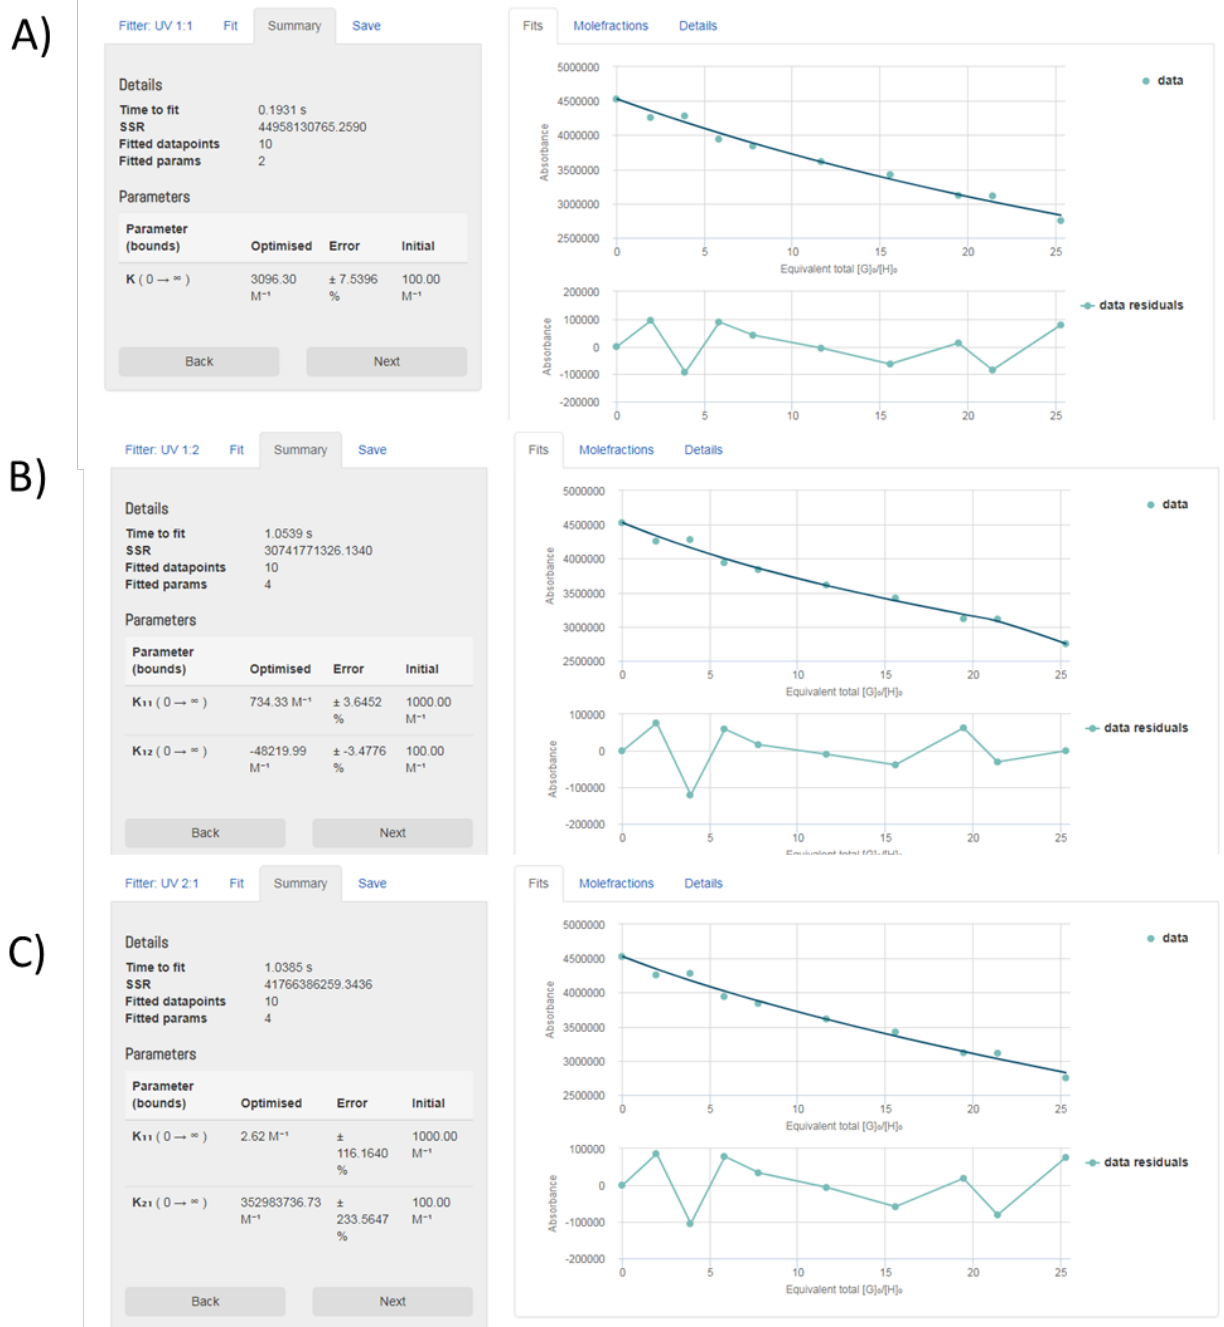

**Fig.S39.** Screenshots taken from the summary window of the website [supramolecular.org](http://supramolecular.org). These screenshots show the raw data for titration of **6** with Lys, the data fitted to 1:1 (A), 1:2 (B) and 2:1 (C) binding models.

A)

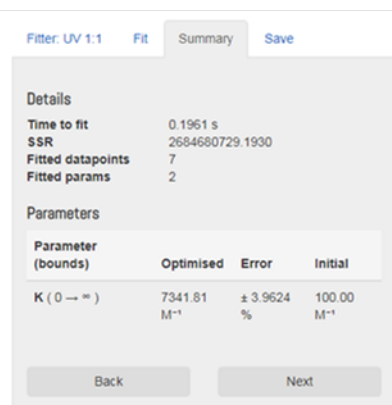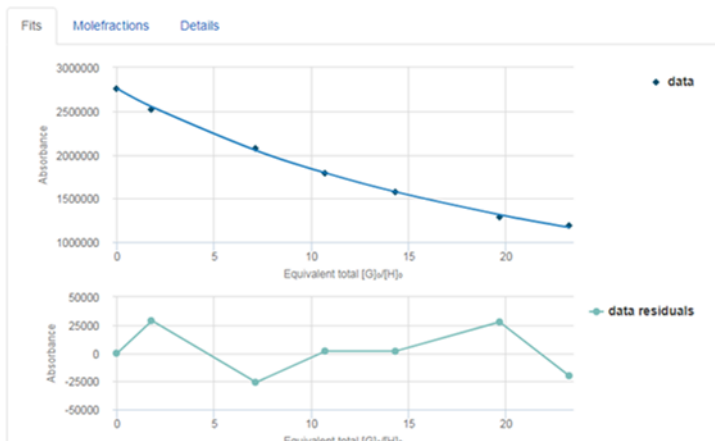

B)

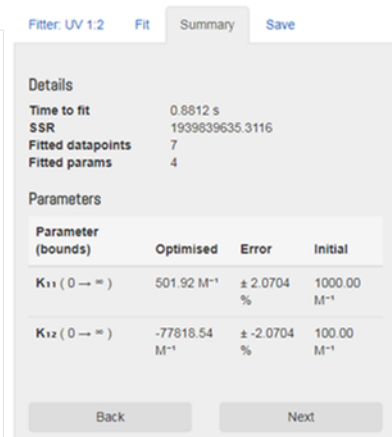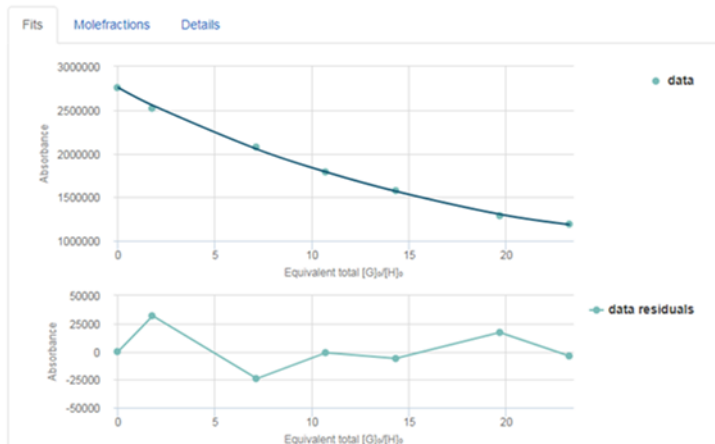

C)

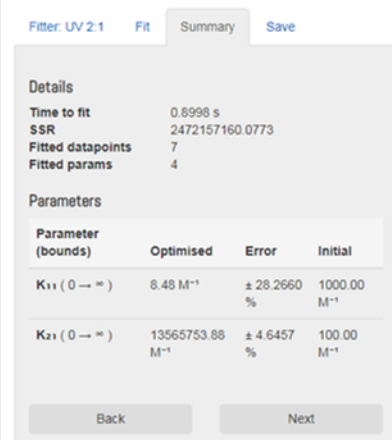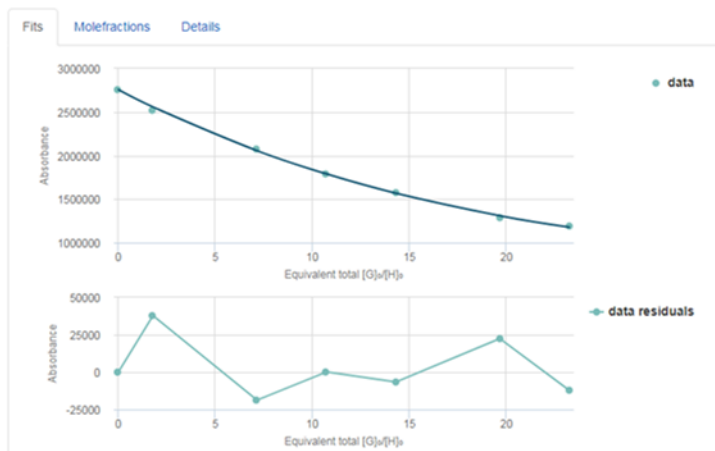

**Fig.S40.** Screenshots taken from the summary window of the website [supramolecular.org](http://supramolecular.org). These screenshots show the raw data for titration of **7** with BSA, the data fitted to 1:1 (A), 1:2 (B) and 2:1 (C) binding models.



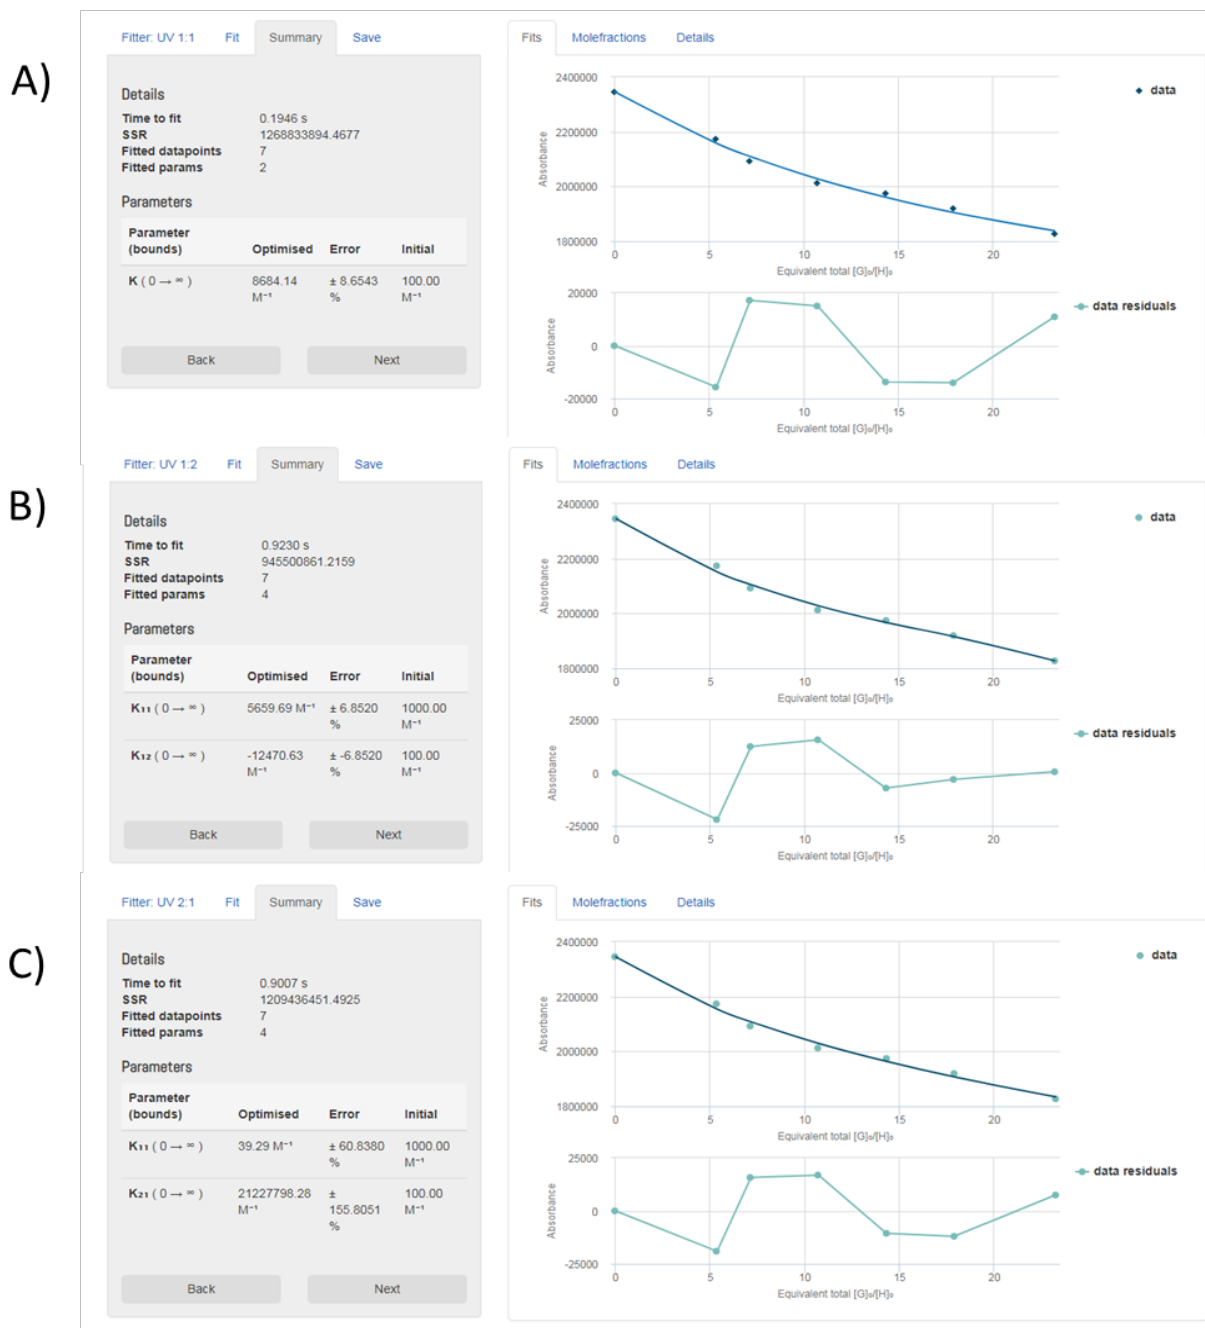

**Fig.S41.** Screenshots taken from the summary window of the website [supramolecular.org](http://supramolecular.org). These screenshots show the raw data for titration of **7** with Hb, the data fitted to 1:1 (A), 1:2 (B) and 2:1 (C) binding models.

A)

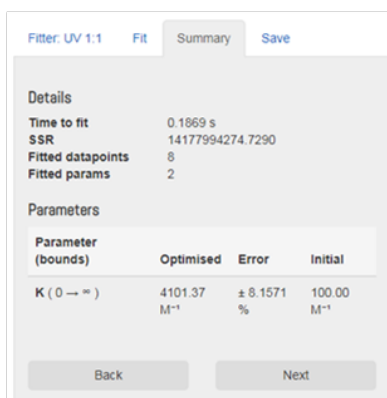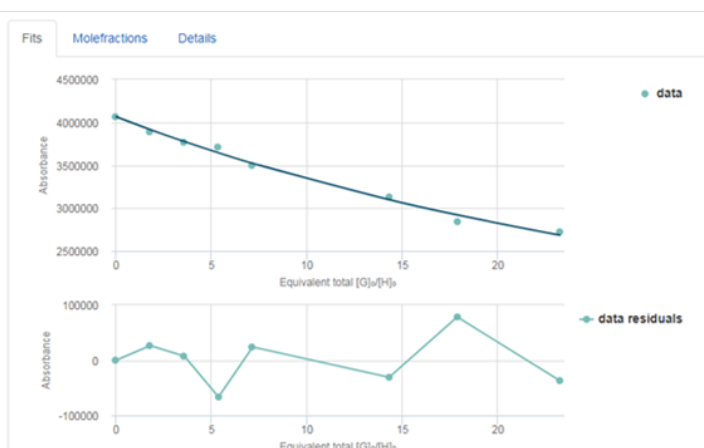

B)

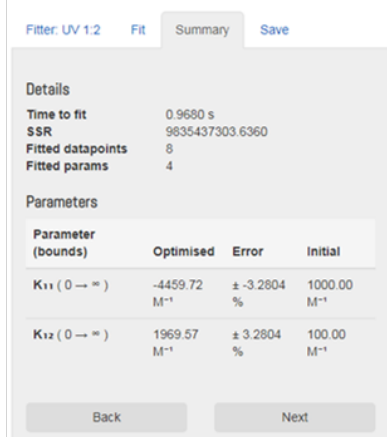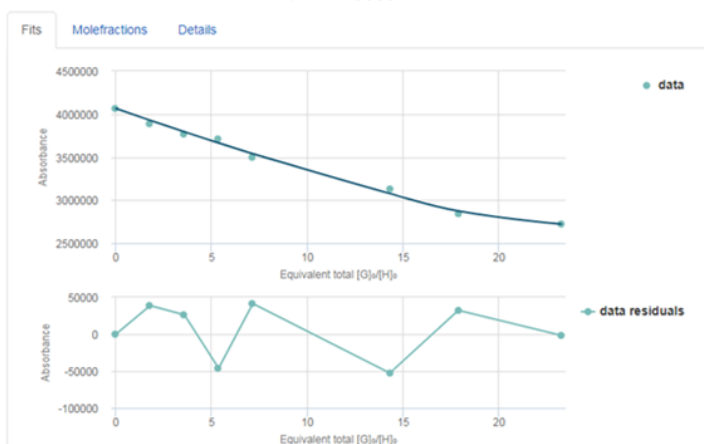

C)

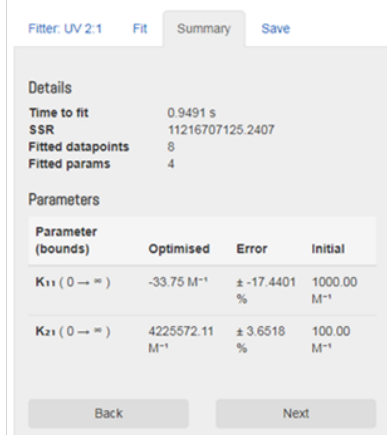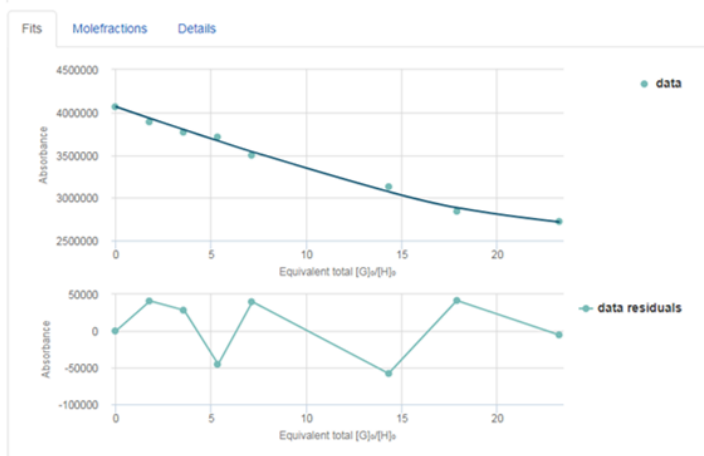

**Fig.S42.** Screenshots taken from the summary window of the website supramolecular.org. These screenshots show the raw data for titration of **7** with Lys, the data fitted to 1:1 (A), 1:2 (B) and 2:1 (C) binding models.
